# Supplementary material for: Selection and Development of Nontoxic Nonproteolytic Clostridium botulinum Surrogate Strains for Food Challenge Testing
Source: MDPI journal article supplement (doi:10.3390/foods11111577), 2022-05-27
Supplement: s1 [file s1]

**Table S1** *C. botulinum* and *E. coli* strains and whole genome sequences used in this work. \*Strains harboring the toxin cluster.

| Strain name            | Isolated from           | Source                                                                    |
|------------------------|-------------------------|---------------------------------------------------------------------------|
| <i>C. botulinum</i>    |                         |                                                                           |
| KI2                    | Meat (Chicken)          | Isolated in this work                                                     |
| ME2.2                  | Faeces (horse)          | Isolated in this work                                                     |
| CH2                    | Dried mushrooms         | Isolated in this work                                                     |
| ZS1                    | Seaweed sample 1        | Isolated in this work                                                     |
| ZS2                    | Seaweed sample 1        | Isolated in this work                                                     |
| ZS6                    | Seaweed sample 1        | Isolated in this work                                                     |
| EV3                    | Meat (Wild boar)        | Isolated in this work                                                     |
| KO2                    | Meat (Rabbit)           | Isolated in this work                                                     |
| RO3                    | Creamy cheese sample 1  | Isolated in this work                                                     |
| RO132                  | Creamy cheese sample 1  | Isolated in this work                                                     |
| MIL1                   | Cheese from alpine milk | Isolated in this work                                                     |
| VAP23                  | Pond sample 1           | Isolated in this work                                                     |
| VAP33                  | Pond sample 2           | Isolated in this work                                                     |
| VAP41                  | Pond sample 3           | Isolated in this work                                                     |
| VAP51                  | Pond sample 4           | Isolated in this work                                                     |
| VAP52                  | Pond sample 5           | Isolated in this work                                                     |
| ZBS2 (ZBS3-12-089-02)  | Intestine (Pike)        | Robert Koch Institute                                                     |
| ZBS3 (ZBS3-12-111-01)  | Bream                   | Robert Koch Institute                                                     |
| ZBS4 (ZBS3-12-114-02)  | Lake sediment           | Robert Koch Institute                                                     |
| ZBS5 (ZBS3-13-004-02)  | Faeces (horse)          | Robert Koch Institute                                                     |
| ZBS12 (ZBS3-14-386-02) | rumen content (cattle)  | Robert Koch Institute                                                     |
| ZBS13 (ZBS3-14-387-02) | Faeces (cattle)         | Robert Koch Institute                                                     |
| ZBS14 (ZBS3-14-405-01) | Duodenum (Mallard duck) | Robert Koch Institute                                                     |
| ZBS15 (ZBS3-14-419-04) | Biogas plant            | Robert Koch Institute                                                     |
| ZBS17 (ZBS3-15-138-01) | Silage                  | Robert Koch Institute                                                     |
| ZBS18 (ZBS3-15-180-01) | Stomach content (human) | Robert Koch Institute                                                     |
| ZBS20 (ZBS3-H163-01)   | Honey                   | Robert Koch Institute                                                     |
| NCTC8266Δbont::ermB*   | Canned salmon (Canada)  | Clauwers <i>et al.</i> , 2016                                             |
| NCTC11219Δbont::ermB*  | Canned salmon (Alaska)  | Clauwers <i>et al.</i> , 2016                                             |
| DSM1985                |                         | German Collection of Microorganisms and Cell Cultures, DSM                |
| CMCC3676               |                         | Colworth Microbiology Culture Collection, CMCC, Parker <i>et al.</i> 2015 |
| CMCC3677               |                         | Colworth Microbiology Culture Collection, CMCC, Parker <i>et al.</i> 2015 |
| CMCC3678               |                         | Colworth Microbiology Culture Collection, CMCC, Parker <i>et al.</i> 2015 |
| K3*                    | Trout (Finland)         | NZ_LFQX00000000.1                                                         |
| K15*                   | Trout (Finland)         | NZ_LFQW00000000.1                                                         |

|                |                                                     |                   |
|----------------|-----------------------------------------------------|-------------------|
| CDC66177*      | Argentinian soil                                    | NZ_ALYJ00000000.1 |
| KAPB-3*        | Salted whitefish (California)                       | NZ_JQOK00000000.1 |
| NCTC8550*      |                                                     | NZ_CP010521.1     |
| Beluga*        | Fermented whale flippers (USA)                      | NZ_ACSC00000000.1 |
| 202F*          | Marine sediment (USA)                               | NZ_NPMX00000000.1 |
| Eklund 17B*    | Marine sediment (USA)                               | NC_010674.1       |
| Alaska E43*    | Salmon eggs associated with foodborne case (Alaska) | NC_010723.1       |
| <i>E. coli</i> |                                                     |                   |
| DH5α           |                                                     | [62]              |
| S17λpir        |                                                     | [63]              |

**Table S2** Growth media and medium supplements used in this work.

| Medium                              | Composition/Brand/Cat N°             | Reference or source                        |
|-------------------------------------|--------------------------------------|--------------------------------------------|
| <i>C. botulinum</i>                 |                                      |                                            |
| Reinforced Clostridial Medium (RCM) | 38 g/l /Oxoid/CM0149                 | Thermofisher Scientific (Waltham, MA, USA) |
| <i>E. coli</i>                      |                                      |                                            |
| Lysogeny Broth (LB)                 | Tryptone 10 g/l /Lab M/MC005         | Thermofisher Scientific (Waltham, MA, USA) |
|                                     | Yeast extract 20 g/l /Oxoid/LP0021B  | Thermofisher Scientific (Waltham, MA, USA) |
|                                     | NaCl 5 g/l /Fisher Chemical/S271-500 | Acros Organics (Geel , België)             |

For solid media, 15 g/l agar was added (Neogen, Lansing, MI, USA)

| Medium supplement    | Concentration                                    | Supplier/Cat N°            |
|----------------------|--------------------------------------------------|----------------------------|
| Erythromycin (Em)    | 5 µg/ml (construction of Em resistant mutants)   | Acros organics/227330050   |
|                      | 3 µg/ml (Selective medium)                       |                            |
| Gentamicin (Gm)      | 15 µg/ml                                         | Fluka Biochemika/GA11897   |
| Cycloserin (Cs)      | 250 µg/ml (construction of Em resistant mutants) | Acros organics/228480010   |
|                      | 100 µg/ml (Selective medium)                     |                            |
| Thiamphenicol (Tm)   | 15 µg/ml                                         | Thermo Scientific/15700899 |
| Chloramphenicol (Cm) | 30 µg/ml                                         | Acros organics/227920250   |
| Lysozyme (Lys)       | 10 µg/ml (heat resistance of spores)             | MP biomedical/100834       |
|                      | 50 µg/ml (selective medium)                      |                            |

**Table S3** Sequences of the target genes for ClosTron intron insertion, and sequences of the retargeted introns. The introns insert between the red nucleotides indicated in bold.

|                                                                                                                                                                                                                                                                                                                                                                                                                                                                                                                                                                                                                                                                                                                                                                                                                                                                                                                                                                                                                                                                                                                                                                                                                                                                                                                                                                                                                                                           |
|-----------------------------------------------------------------------------------------------------------------------------------------------------------------------------------------------------------------------------------------------------------------------------------------------------------------------------------------------------------------------------------------------------------------------------------------------------------------------------------------------------------------------------------------------------------------------------------------------------------------------------------------------------------------------------------------------------------------------------------------------------------------------------------------------------------------------------------------------------------------------------------------------------------------------------------------------------------------------------------------------------------------------------------------------------------------------------------------------------------------------------------------------------------------------------------------------------------------------------------------------------------------------------------------------------------------------------------------------------------------------------------------------------------------------------------------------------------|
| Gene <i>XkdK</i> (targeted in strains ZBS4-VAP51-ME22), intron insertion between nucleotides 471 and 472 in sense orientation.                                                                                                                                                                                                                                                                                                                                                                                                                                                                                                                                                                                                                                                                                                                                                                                                                                                                                                                                                                                                                                                                                                                                                                                                                                                                                                                            |
| ATGGCAGGTGGAACATGGGAAAAACAAAATAAAATAAGAGCAGGAGCTTATGTTAATTTTAA<br>AAGTAAAAAGAATAATGATAGTAACAATAATGATAGAGGGGTAATGGCGTTACCGTTAGTATT<br>ACCTTTTGGACCAGAAAAACAATAGTAAAAATAGATAATGAAACAGATTTGTTAGGAACAA<br>TAGGAATGGAAATAAATGAAGAAAGCACTCTAATGCTTAAAGAAGCCTTAAAGAAAGCAAA<br>AACAGTTTTATTAACAGACTTAATGAAGGTGTTAAGGCTACTAAGGTGCTAGGAGAATTAACA<br>GTAACATCAAAATGGAGTGGAAAGTAAAGGAAATGATATAAGAATTCAAATTCAAACCAATGT<br>AAATGATGAAGGTAAATTTGATGTAATTACATTCTTAGAATATACAAAATTAGATACACAAAC<br>TGTA AAAAATATTGATGAGTTGGTATCTAATG <b>CA</b> CTTGTAGACTTTAAAGGATCAGGTGAACCTT<br>ACTTTATCTGCTGGAGTAAAGCTAGAGGGTGGAGAAGATAAACCTATTACAGGAAAGGATTAT<br>GTAGATTTTTTAGCAGAATTAGAATTATTTGATTTCAATACTGTAGCAATACCGTATGATGAGT<br>CAGATACTAAGTTAGTTGTA AAAGAGTTTATTAAGAGGTTAAGAGAATATGAAGGAAGAAAA<br>GTTCAAGCTGTTTTACCAAACCTTTGCAGAAGCAGACTATGAAGGGATTATATCTATAAAGAAT<br>GGTGTGTATCTTAAAGATAATGTACATGTA ACTAATGTACAAGCAACAGCATATGTAGCAGCA<br>TTAACAGCAGGATCAGGTTATGCTAATTCTAATACTTATGCTTTGTATGAAGGTGCAAGCAATG<br>TTGATGTTAGATATGCAGATAGTGAAATAAAAGAGATAATCAAAAAAGGTGAAATAATATTTA<br>TTAATAATAATCAACAAGTTTTAATTGAACAAGATATTAACACATTAAAGACTTTTACAGAGG<br>ATAAAAAGTCTGACTTTAGAAAAAACAGAGTTATAAGAGTTTTAGATGGAATAAATGACAAG<br>ATTAAATATAAGTGGGAAGAATCTTATATTGGCAAAGTAAGCAATAATGAGGATGGAAGAAA<br>CTTATTTAAGAAAGATATATTAATATTTTAGAAACATTACAAGGACAAGGAGCATTAGAAAA<br>TGTAGTTGTAGAGGATATTGAGGTACTTAAAGAAATTCTAATGATTCTATTGTTGTAAATGTTA<br>ATGCGCAACCAGTAGATAGTATGGAAAAATATATATGACTGTATTTATATAA |
| Intron sequence targeted towards <i>XkdK</i> (471-472s)                                                                                                                                                                                                                                                                                                                                                                                                                                                                                                                                                                                                                                                                                                                                                                                                                                                                                                                                                                                                                                                                                                                                                                                                                                                                                                                                                                                                   |
| TTATCCTTAGTATCCAATGCAGTGCGCCAGATAGGGTGTTAAGTCAAGTAGTTTAAGGTACTA<br>CTCTGTAAGATAACACAGAAAAACAGCCAACCTAACCGAAAAGCGAAAGCTGATACGGGAAC<br>AGAGCACGGTTGAAAGCGATGAGTTACCTAAAGACAATCGGGTACGACTGAGTCGCAATGT<br>TAATCAGATATAAGGTATAAGTTGTGTTTACTGAACGCAAGTTTCTAATTTTCGATTGATACTCG<br>ATAGAGGAAAGTGTCTGAAACCTCTAGTACAAAGAAAGGTAAGTTAAGTGCATTGACT                                                                                                                                                                                                                                                                                                                                                                                                                                                                                                                                                                                                                                                                                                                                                                                                                                                                                                                                                                                                                                                                                                                     |
| Gene <i>SPP1</i> (targeted in strain ZBS3), intron insertion between nucleotides 105 and 106 in sense orientation                                                                                                                                                                                                                                                                                                                                                                                                                                                                                                                                                                                                                                                                                                                                                                                                                                                                                                                                                                                                                                                                                                                                                                                                                                                                                                                                         |
| ATGTTGGGAGTTAAAAGTATATGGAATAAACTTAAGAAAGGAGTGAAAGCAGGTATGGCAGC<br>AGCACAAAGTTAAAAGTATTATTGATGATGAGCAGATTGTTGG <b>AA</b> TGATAACTGAGTTTAATAT<br>GTCACAAAAAAGAAAACCTTATGATTATAGGTTCTAAATATTATGAGGTTGAAAATGATATTTTT<br>AAAAGAAAACAAACAAAGTAGTTGATGGTGAAACAATAGAAGAACTTATAAGGCTAATA<br>ATAAACTAGCACATGCTAAGTATAAAAACATAGTTGACGAAAAGGTTGCATACTTGCTTTCAA<br>GACCCTATTCTTTAAATTGTGATGATAAGCAGTATATAGAAAAAATCAAGGATTTCGCTAGGGA<br>AGCACTTTCAATATAAGTTGTCAGGATTAGGATATGAGGCAAGCAACAAAGGTATTTTCATGGT<br>TACAGCCTTATATAAATGAACAGGGTAAATTTAGTACTATGATTATACCTTCAGAGCAATGTAT<br>CCCTATCTGGAAAGACAATAGCCATATGGAGTTAAGTGGCATGATAAGAATATATGAAACAA<br>CTTACTGGGTTGGATCTACTAAGAAAACCTGATACTAATGTTGAGGTTTGAGCAAGATGGCG<br>TTGTTTATTATAAATTAGATGATAAGAAATTAATATATGATTATGGCAAATCTAATGATATAGA<br>CAATGGCGGCCCAATAGCACATTTTAAAAGAGATGATGAGTGGATTTTCATGGGGAAAGGTTCC<br>TTTCATACCGTTTAAAAATAACAGAGTAGAAATGCCTGATATTAAGTTTGTTAAATCTCTACTA                                                                                                                                                                                                                                                                                                                                                                                                                                                                                                                                            |

GATGAGTATGATAAGTCGAGATCAGAAGCAGCTAATTATGTGGAAGATGTAAAGAATTTAATA  
TTTATTTTAAAGGGTTATGGTGGAGAAGATATTAAGGAGTTTATGAAGCATCTTAATGAAGATA  
GAGCAATTCCAATTGATGACCCACAGGATGGTGGAGTTGATGCTTTAACTCCTACAATGGACA  
TAACAGCTTTAAGAGAACATTATGAACAACTTAAAAGGGATTTAACAGAAGATGGACAAAGT  
ATTAATAAAGATTTAGATAAGTTTGGTAGTGCTCCAAGTGGCGTTGCTCTTAAGTTTATGTATG  
CAGGACTAGATCTAAAAAGTAATGCATTAGAGGTTGAATTTAAAATGGGTTTTGAAAGTTTATT  
ATATTTTATAAATATATACTTAGGTGAAACAAATCAAGGAAATTATAATAGTGATACAATTAA  
TCTAGATATCGAGTTTAATAGGGATATGGAAATTAACGAAAGTGAAATTATTGATAACTGTAG  
TAAATCAAAAGGCATTGTCAGCGACGAATTGATATTAGCTAATCACCCATGGGTAAAGACAT  
AGAAAAGGAAAATGAGGCATTAGATAAGCAGACTAAAGCTAGTTTGCCATTTAAAGATAGAG  
TTCCTATAAATGAGGGTGATTCTATTGAATAA

Intron sequence targeted towards *SPP1* (105-106s)

TTATCCTTACAGATCGTTGGAGTGCGCCAGATAGGGTGTTAAGTCAAGTAGTTTAAGGTACTA  
CTCTGTAAGATAACACAGAAAACAGCCAACCTAACCGAAAAGCGAAAGCTGATACGGGAAC  
AGAGCACGGTTGGAAAGCGATGAGTTACCTAAAGACAATCGGGTACGACTGAGTCGCAATGT  
TAATCAGATATAAGGTATAAGTTGTGTTTACTGAACGCAAGTTTCTAATTTCCGTTATCTGTCGA  
TAGAGGAAAGTGTCTGAAACCTCTAGTACAAAGAAAGGTAAGTTAATTCCAACGACT

Gene *TTMP* (targeted in strain CH2), intron insertion between nucleotides 523 and 524 in sense orientation

ATGTCGATAAATGTAGGATCGGCCATTGCATATCTAACCTTAGATAGATCAAGCTTTACAAATG  
GAATCAAATCAGCGGGAGAGGATTTGAAAACTTTGTTAGTGGATCAAATAGTGCAGAAGATT  
CCATAAAGTTATTGAGAAATTCAATGAAATCTGTAGGATCTGCAATGGCCATGCCTTCCACGA  
AAGCTGGAGACTTCTTAGCGGTAGCAACAAACACCGCTATGGGTTTTGAGGAACAAATGTCTA  
AAGTTAAGGCAATAAGTGGAGCTACTGGCGATGACATGGTAAAATTATCAACTCTATCTAGGG  
ATATGGGAGTCAGTACAAAATTTAGCGCCAAGGAGAGTGGCAAGGCCCTAGAATATATGGCG  
ATGGCGGGTTGGAAAACCGATCAAATGATGGAAGGATTGCCGGGCATTTTAACTTGGCAGCC  
GCAGCGGGTGGGGATCTAGGTAAACTTCCGATATTGTAAGTATGCGTTAACAGGATTCGGA  
TTAACTGCCAAGGATAGTGGCCATTTGCTGATGTGTTGGCATCTGCCAGTAGTAATGCAAAG  
ACGAATGTTAGTTTACTGGGTGAATCATTTAAATATGTTGCACCAGTAGCCGGTGCGTTAAAGT  
ATTCAGTCGAAGATACATCGTTAGCATTGGGATTGATGGCTAACTCAGGAATCAAGGGATCAA  
GTAGTGGTACTGCACTTAGGGCCGATTGACGAATATGGTTGAACCTACAGATAACATGGCAA  
ATGTGATGGATCAATATGGTATTAGTCTTACTAATACCGATGGTAGCATGAAGTCATTAAGG  
AAGTTATGGATACCTTGAGGAATAAGATGGGTGGCCTCGATGAGCAAACCAAGAAATCAGCA  
GCCGCAACACTTTTCGGAAAAGAGGCAATGTCCGGTATGCTTAGTGTTATTAATGCTAGTGATG  
CTGATTATAACAAGTTATATGAAAATTTAACTAATGCCGATGGTGCAGCAAAAAAACAGCTG  
ATACAATGCAAGATAATTTAAAAGGAAAGTTGACAACCTTAAATAGTGCATTTGAGGAATTAC  
AAATATCATTAGCAACCGCAGTTGTACCAATGTTAAATAAATTAGTTTCAATATTAATCACATT  
AATTAATAAATTTAACGCTTTACCACAGCCAGTAAAATCAGCCATTGGAATGATAATTGGTGG  
TATTGCTTTGTTTAGTCCAGCATTTTTGATATTAGGAAAATTAGTTAACACCATTTGGAACCGTGG  
TCGGTGTGTTTAGTAACTTAAGACTGCTGCAAATATTTTTAACTGTTACCTATGATAATGAGT  
CCACCAGTTTCAGGGATTATATTAATTATTGGAGCCATTATACTTGTAGTATATGAGGTTATAA  
AACATTGGGATAACTTAAAATCATATTTTGGAACTTTTGGGCATGGGTAAAAATATCTTTAG  
TAGTTTTTGGGAGTGGCTTAAAACATTCTTTAGTAAATGGGGGCCAACGATCTTGACCATTATC  
GCGCCATTTTTAGGAATACCACTATTAATAATTCAACACTGGGATAAAGTAAAAGAGGCCTTT  
ACATTTTTGTTTGAACATTTAAAAACTATATGTACTAAAATCGGAACATTTTTTCAGTAATGCTAT  
AGAATTTTGGAAAGGTATTTGGAATGGTTTTAAAGACTTCATGGGAAGTATAGCGGATTGGATT  
GTTGATGGTTTATTAGGTGGACTAAAAAGGGGTATGGGTAAAATAAAAGAGGGTGCATCAAAT

|                                                                                                                                                                                                                                                                                                                                                                                                                                                                     |
|---------------------------------------------------------------------------------------------------------------------------------------------------------------------------------------------------------------------------------------------------------------------------------------------------------------------------------------------------------------------------------------------------------------------------------------------------------------------|
| ATGGCTAATGGTGTA AAAAGATACATTTAAAAAACTACTGGGTATTA ACTCACCATCGCGAGTA<br>TTTAAAGGATATGGTGTTAACATTGGCGAGGGTTTAATTGAGGGAATGGATTCCCACGAATCA<br>GCCATTAACGGTAAGTTTGAAGGTGTTTCGAACAAGATTAAGAACTTGGAATATTAAACCG<br>AATTTTAATTTAAACAATACTGGTTTAAGTGGTGATTATATTGGATCAAGTAACATTGCAAATT<br>CAAGTGCCAAACA ACTTAATTTTACACCTAATATTAATATGCAAGTTCATATTGCTGATACTGG<br>AGCAAAAGGCACGGCGCAGCTTACAAGTGA ACTTAAGAGCATGGCCCCAAAATGCATTTAAAA<br>ATAGTATGGTTAATGAATTCATGGCAGATGCTTTAAGACTATAG |
| Intron sequence targeted towards <i>TTMP</i> (523-524s)                                                                                                                                                                                                                                                                                                                                                                                                             |
| TTATCCTTACCAAGCATAGTGGTGCGCC CAGATAGGGTGTTAAGTCAAGTAGTTTAAGGTACTA<br>CTCTGTAAGATAACACAGAAAACAGCCAACCTAACCGAAAAGCGAAAGCTGATACGGGAAC<br>AGAGCACGGTTGAAAGCGATGAGTTACCTAAAGACAATCGGGTACGACTGAGTCGCAATGT<br>TAATCAGATATAAGGTATAAGTTGTGTTTACTGAACGCAAGTTTCTAATTTCCGGTCTTGGTCGA<br>TAGAGGAAAGTGTCTGAAACCTCTAGTACAAAGAAAGGTAAGTTAGCCACTATGACT                                                                                                                               |

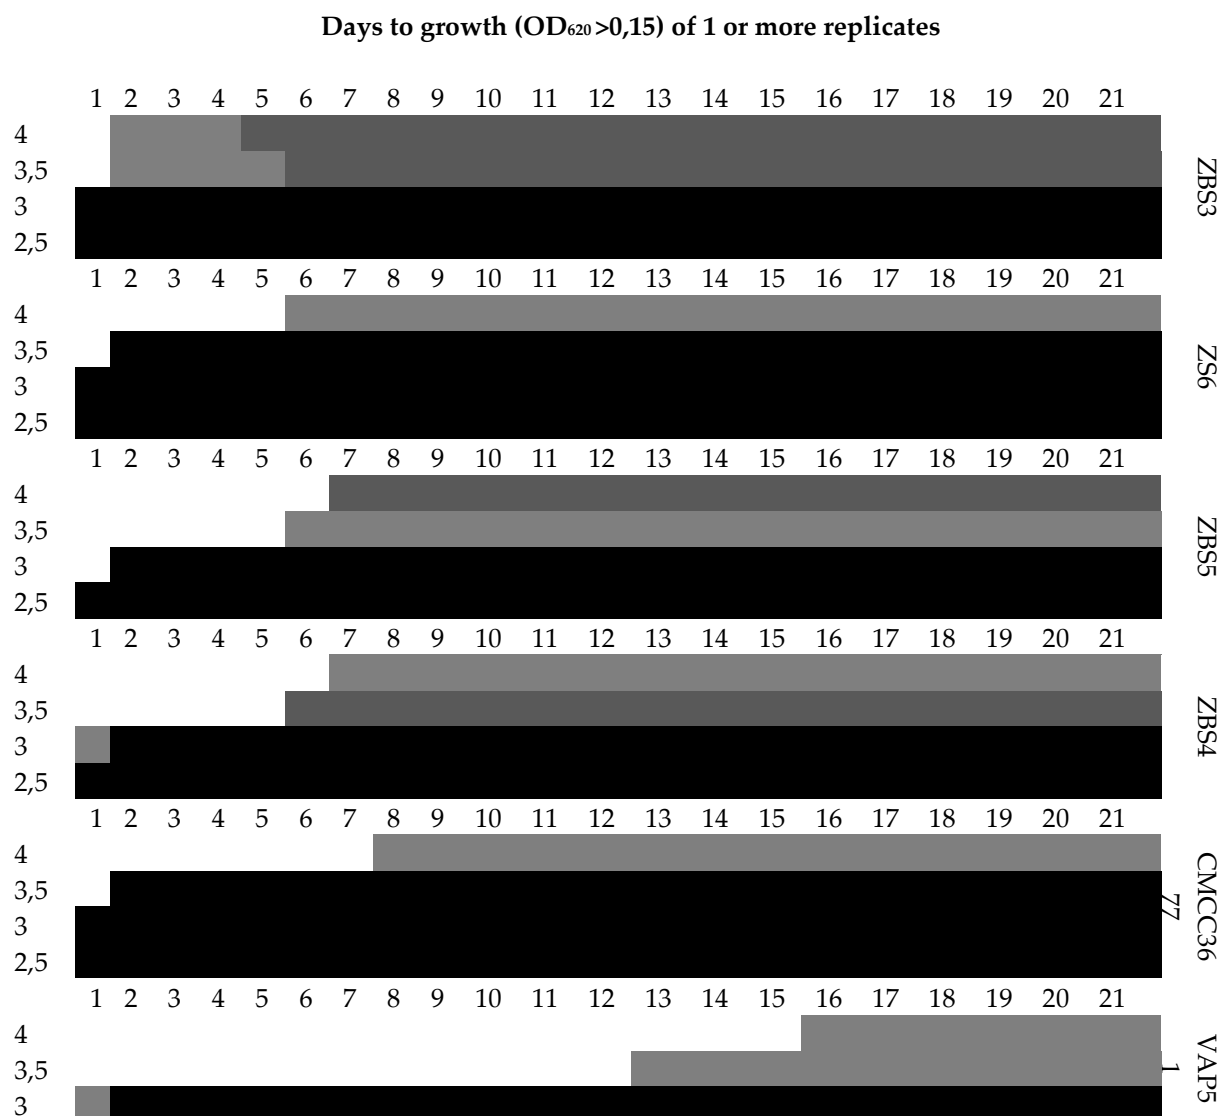

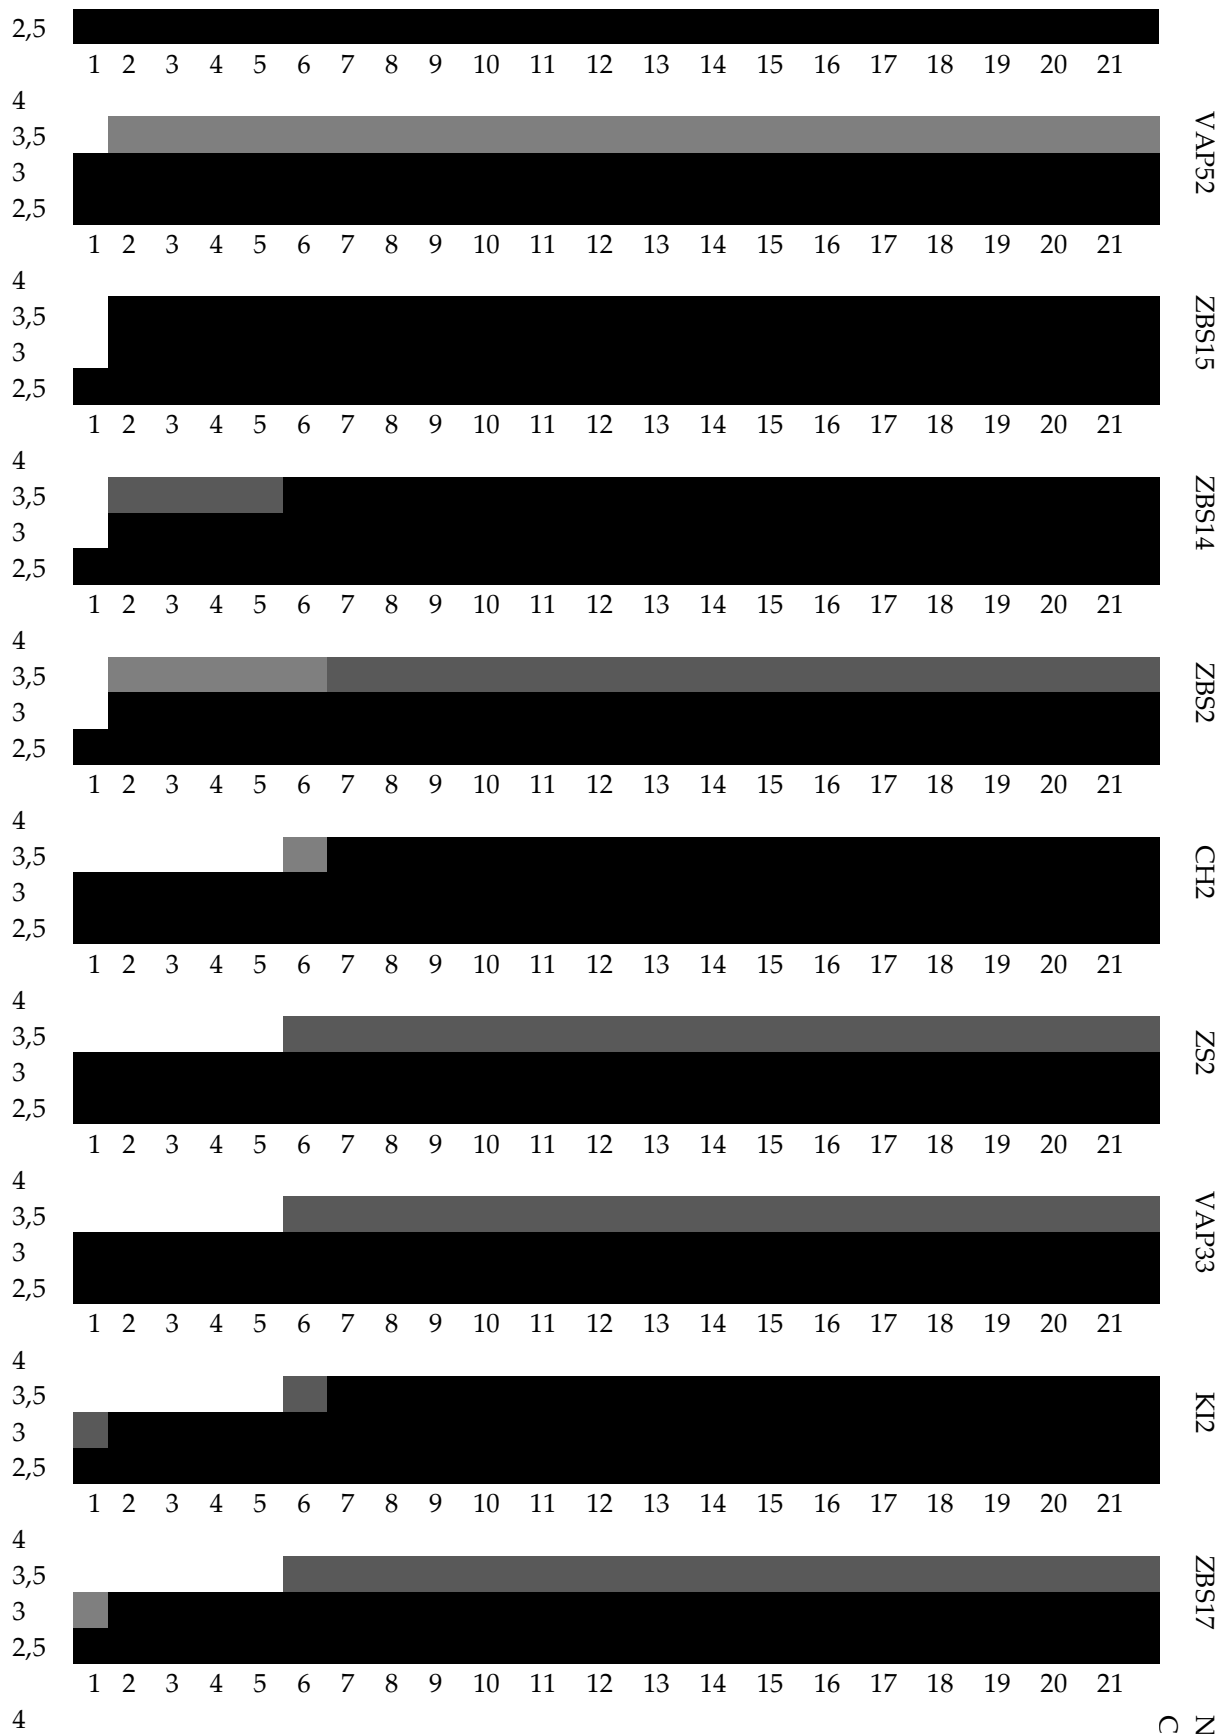

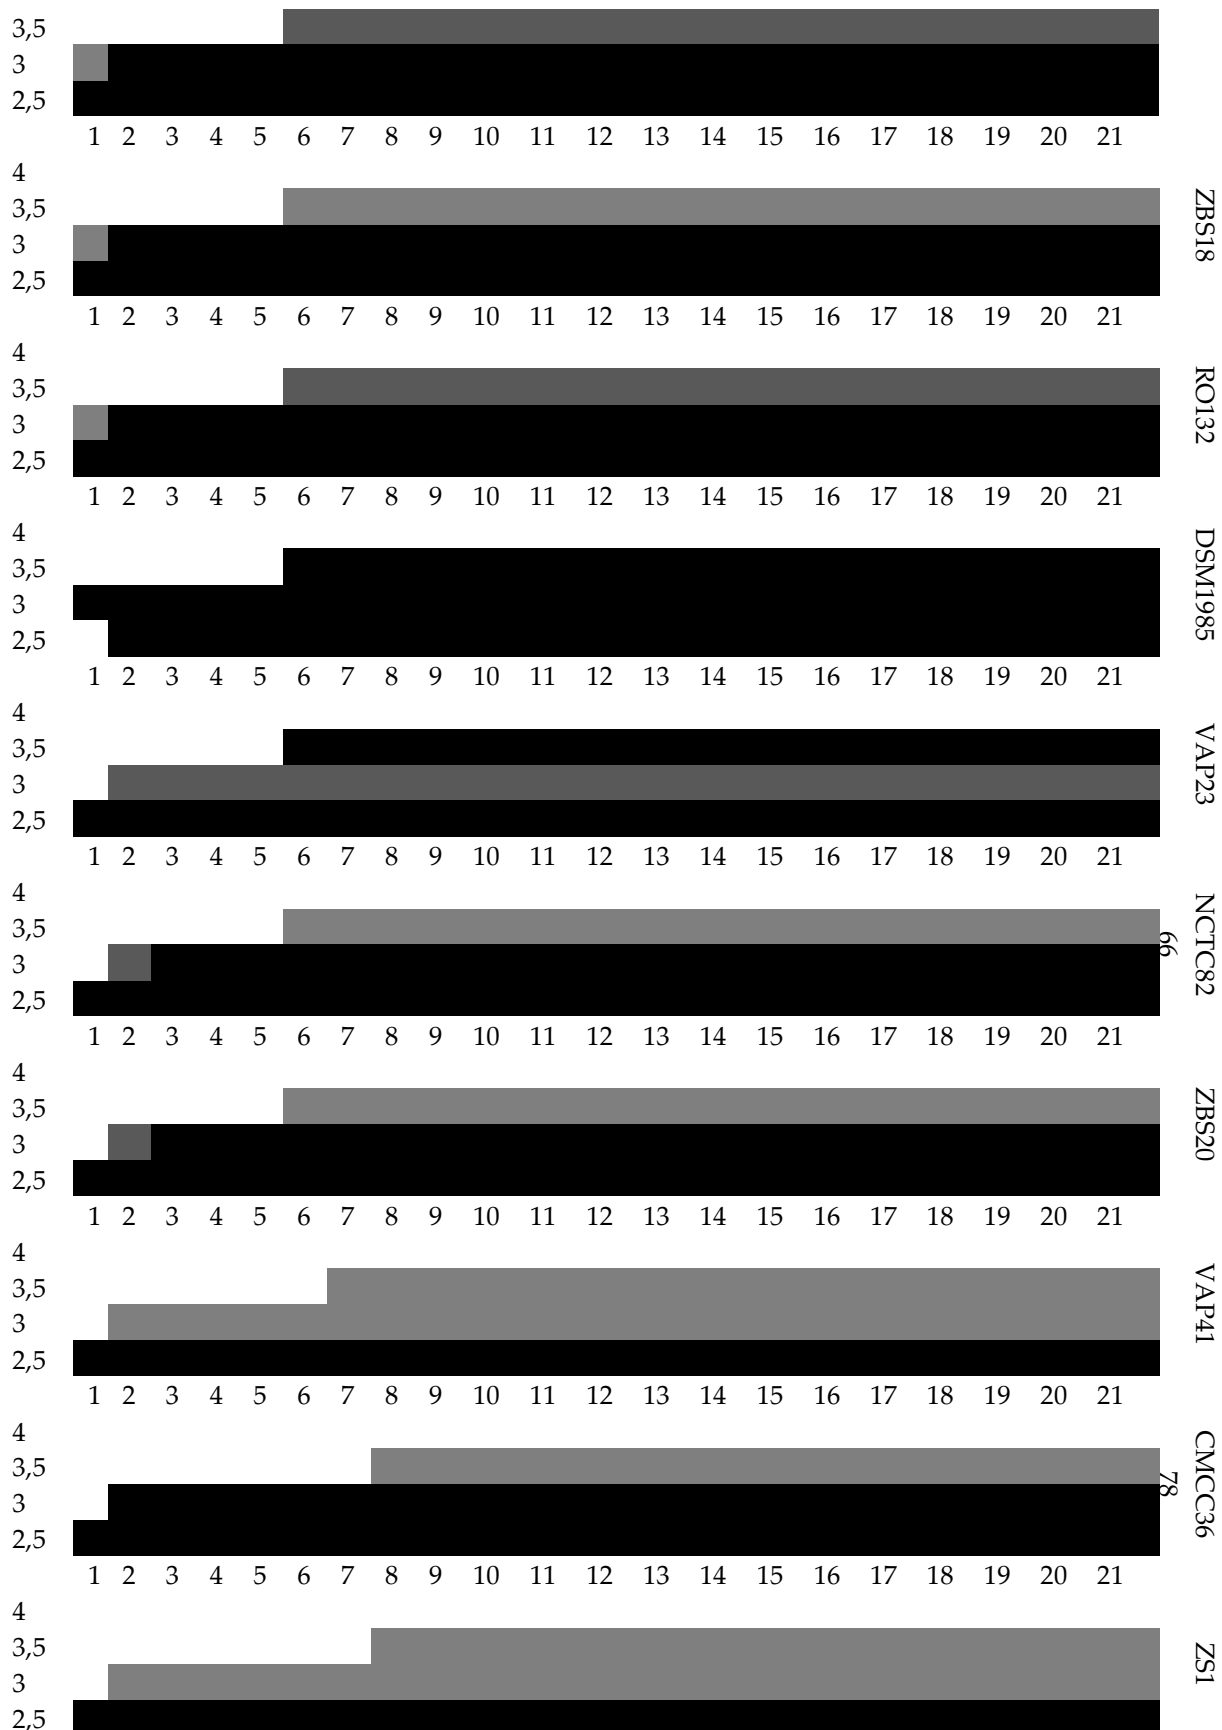

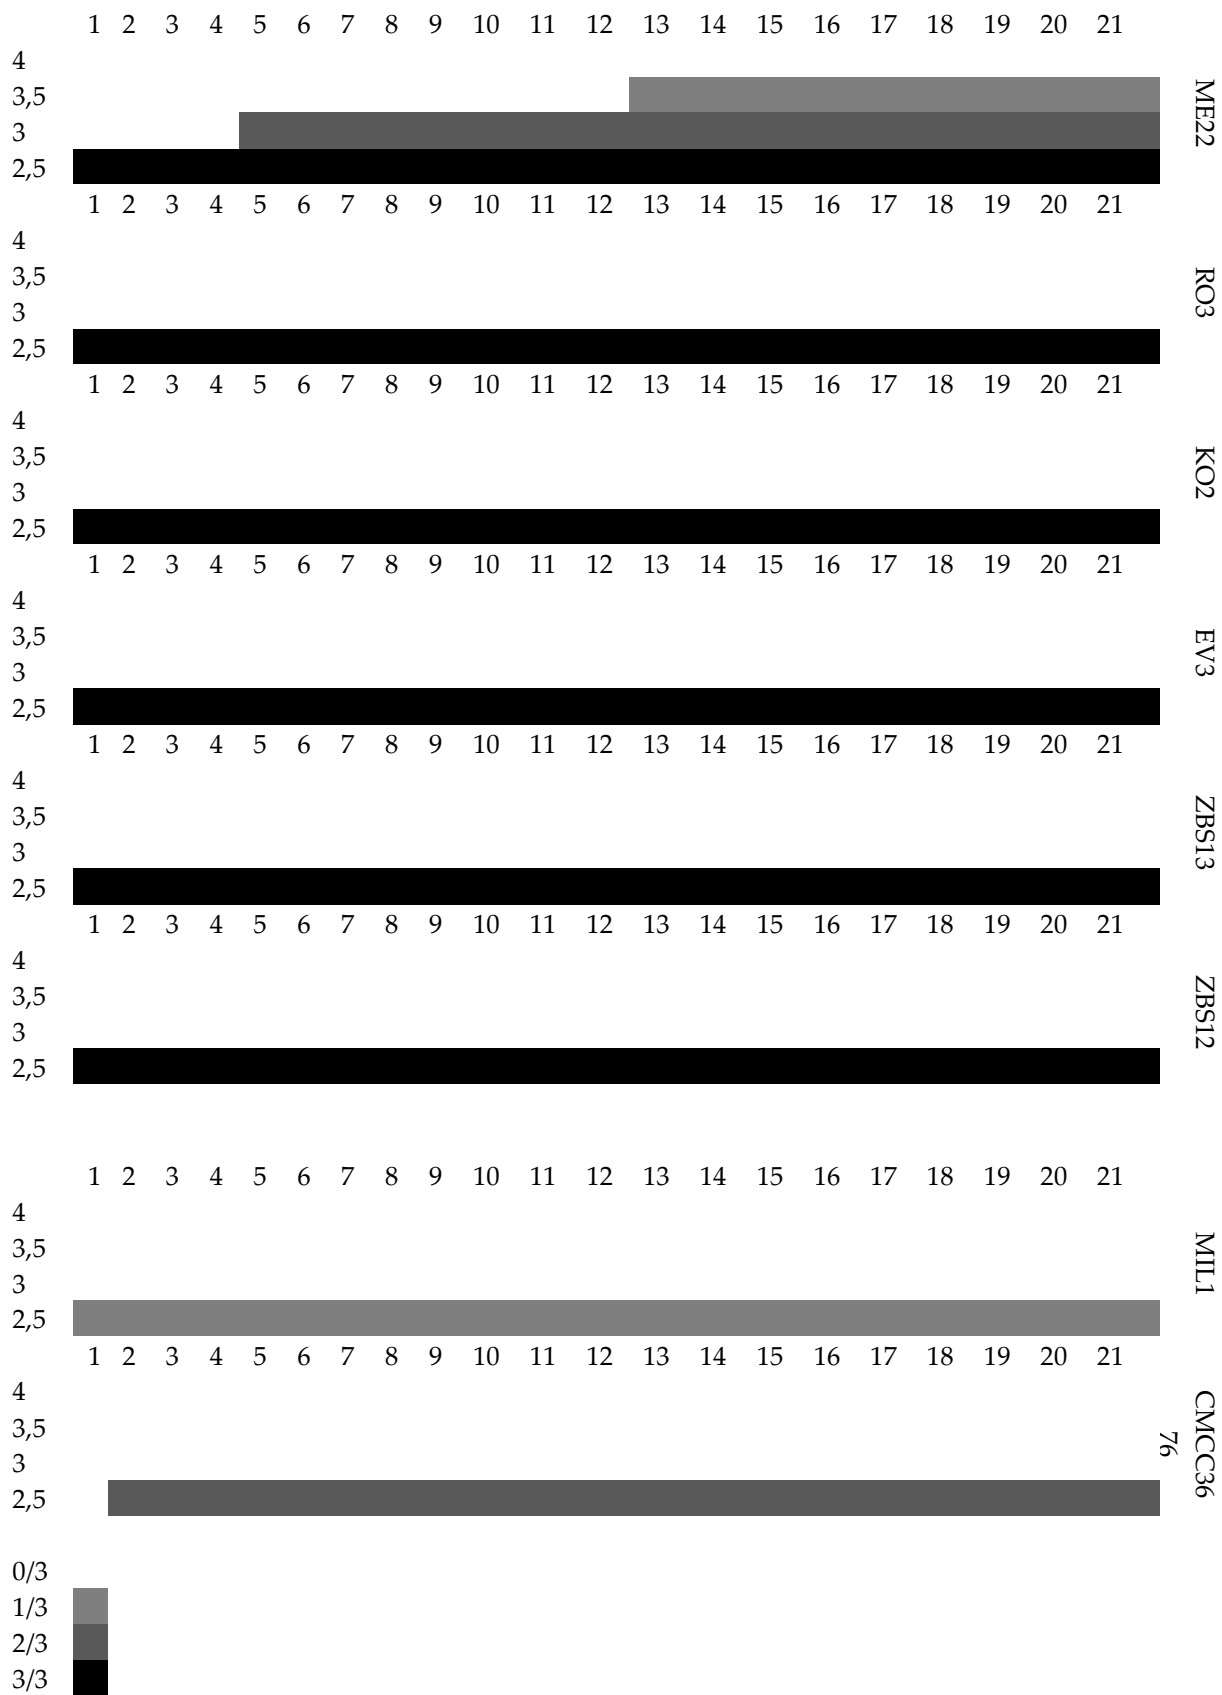



**Figure S1** Salt tolerance of different nontoxic isolates, NCTC8266 $\Delta$ bont::ermB and NCTC11219 $\Delta$ bont::ermB in liquid RCM medium supplemented with different amounts of NaCl. Growth at 30°C in 2.5%, 3.0%, 3.5%, 4.0% and 4.5% NaCl was studied for 21 days for three replicates per strain. Growth of all replicates is indicated. None of the strains grew at 4.5% NaCl.

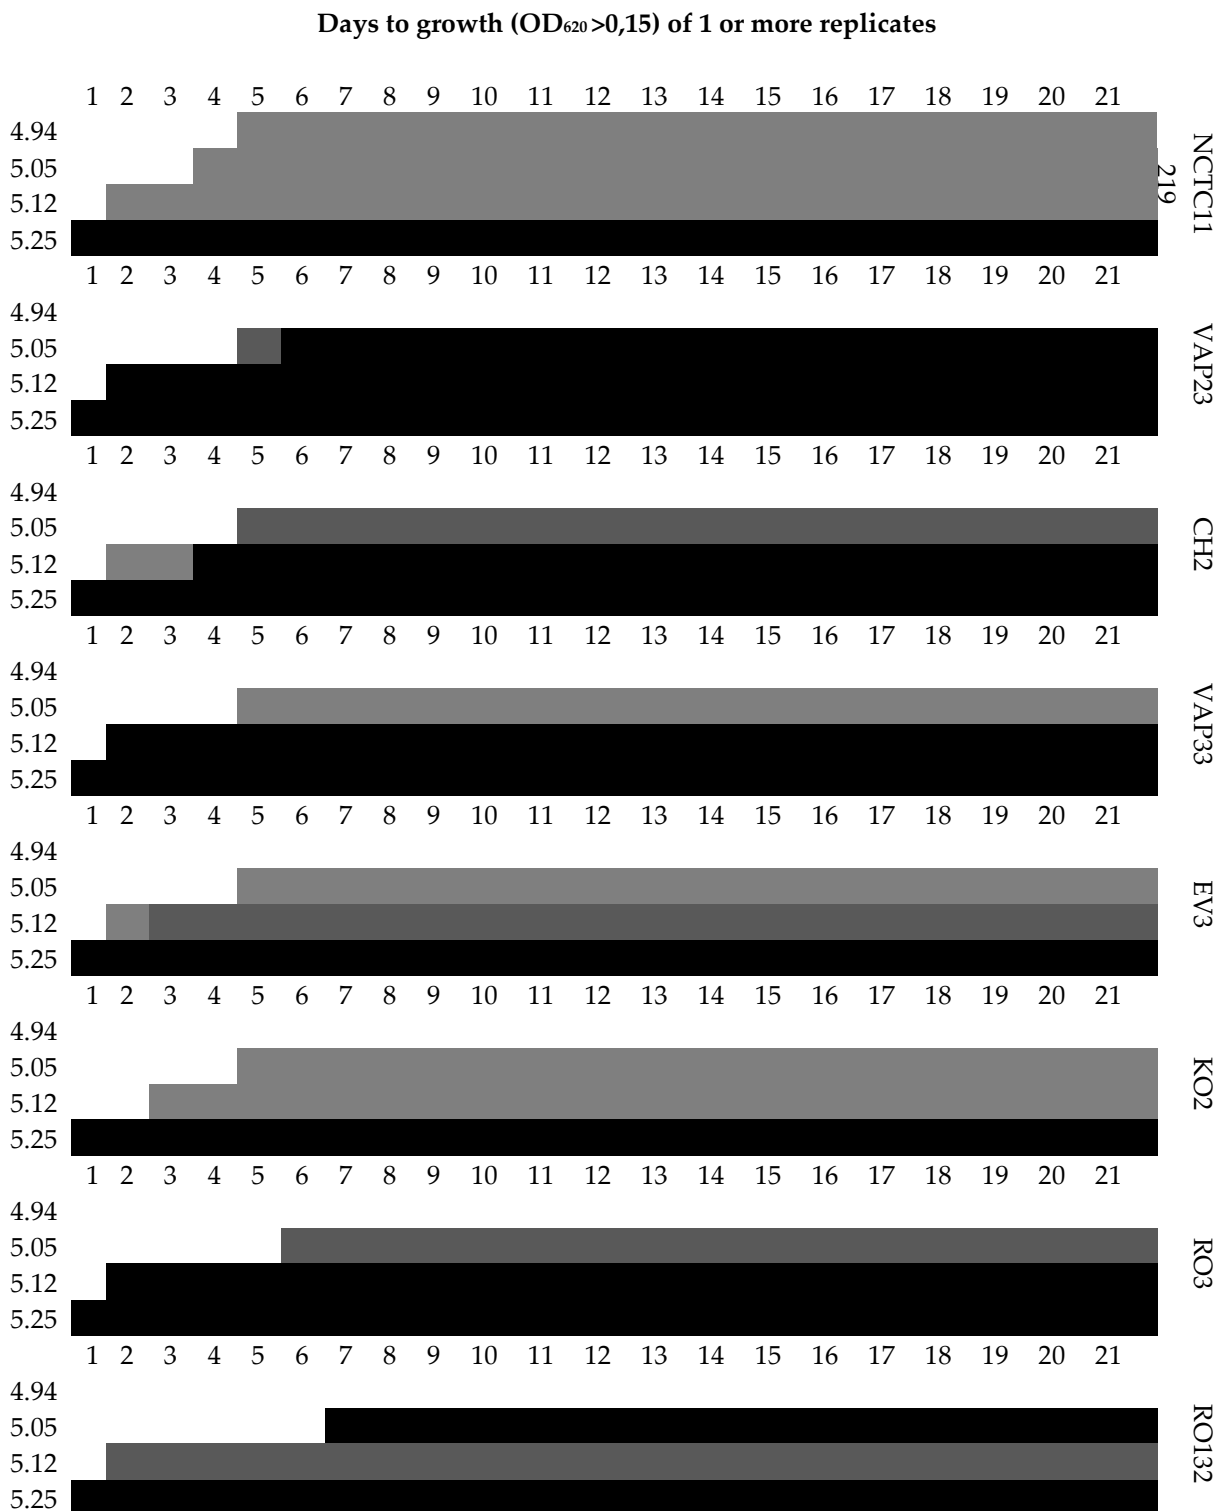

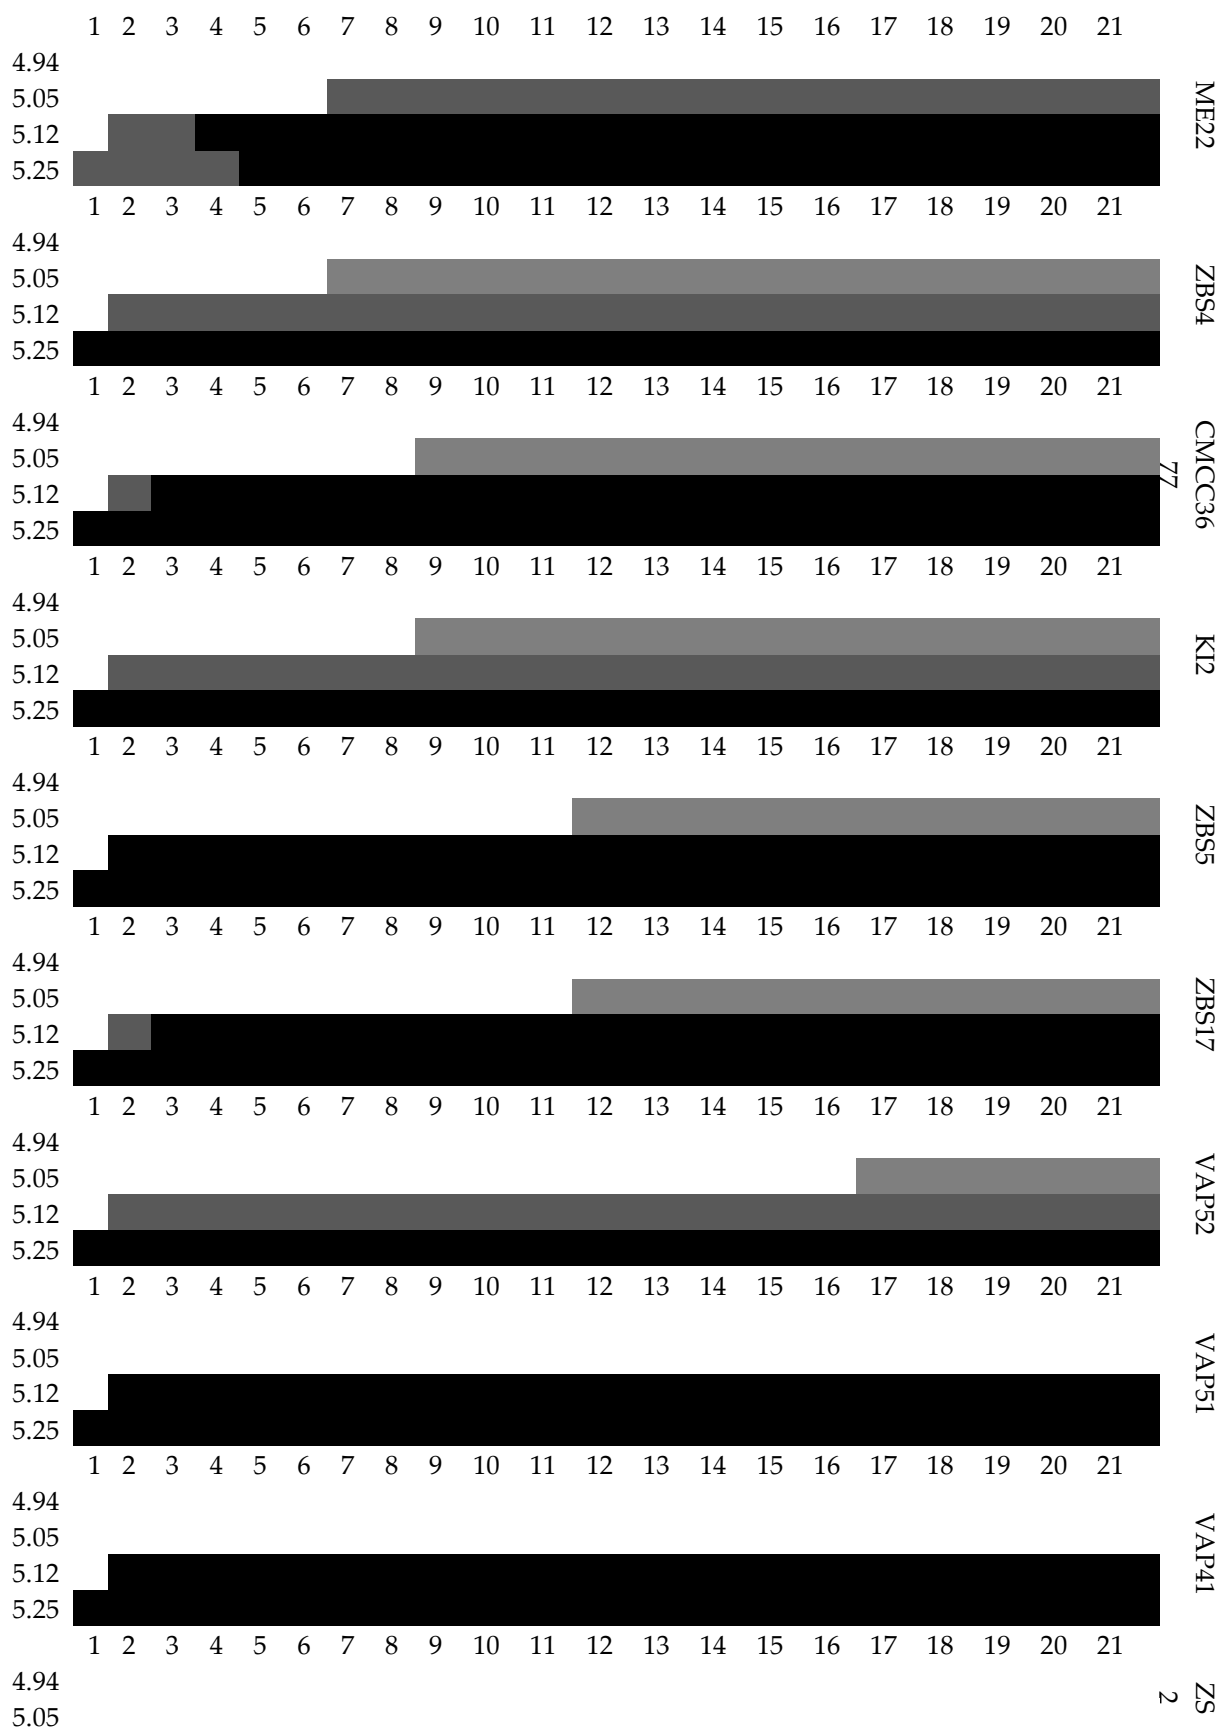

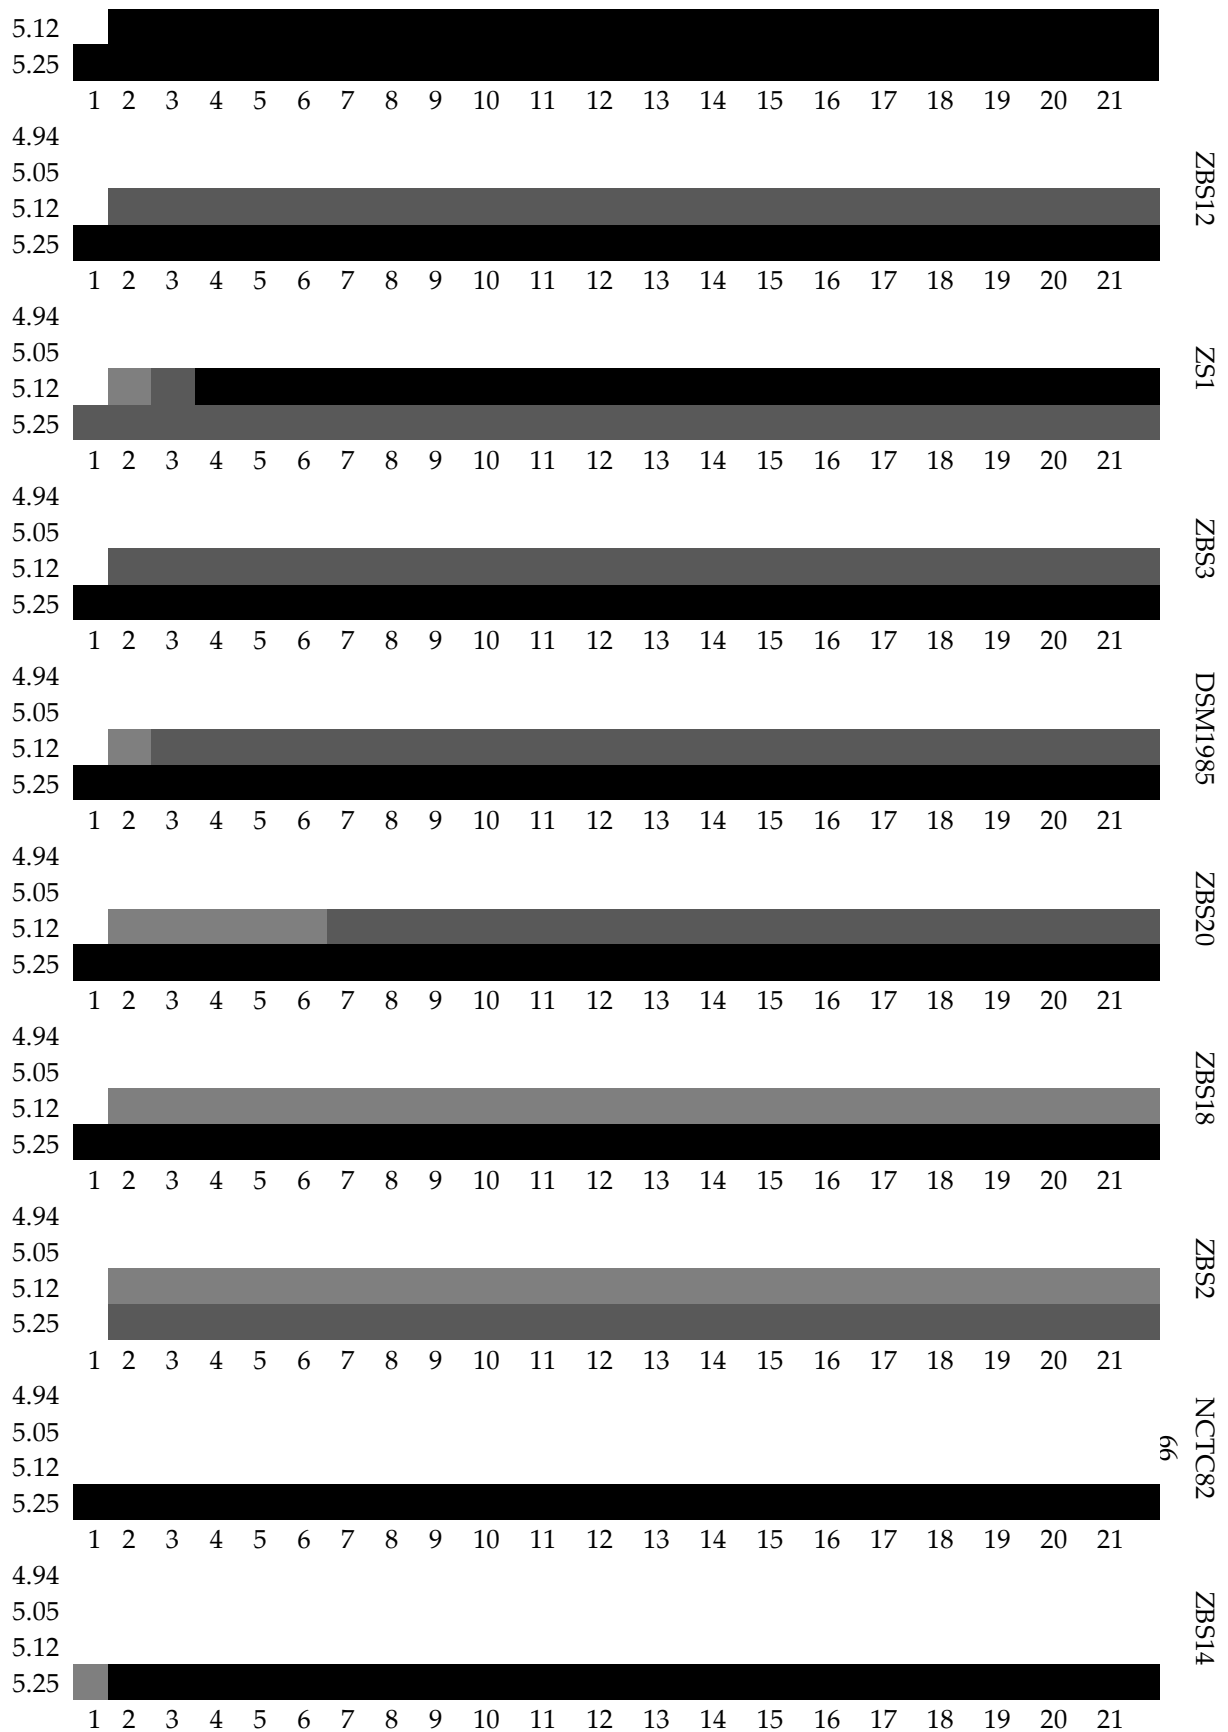

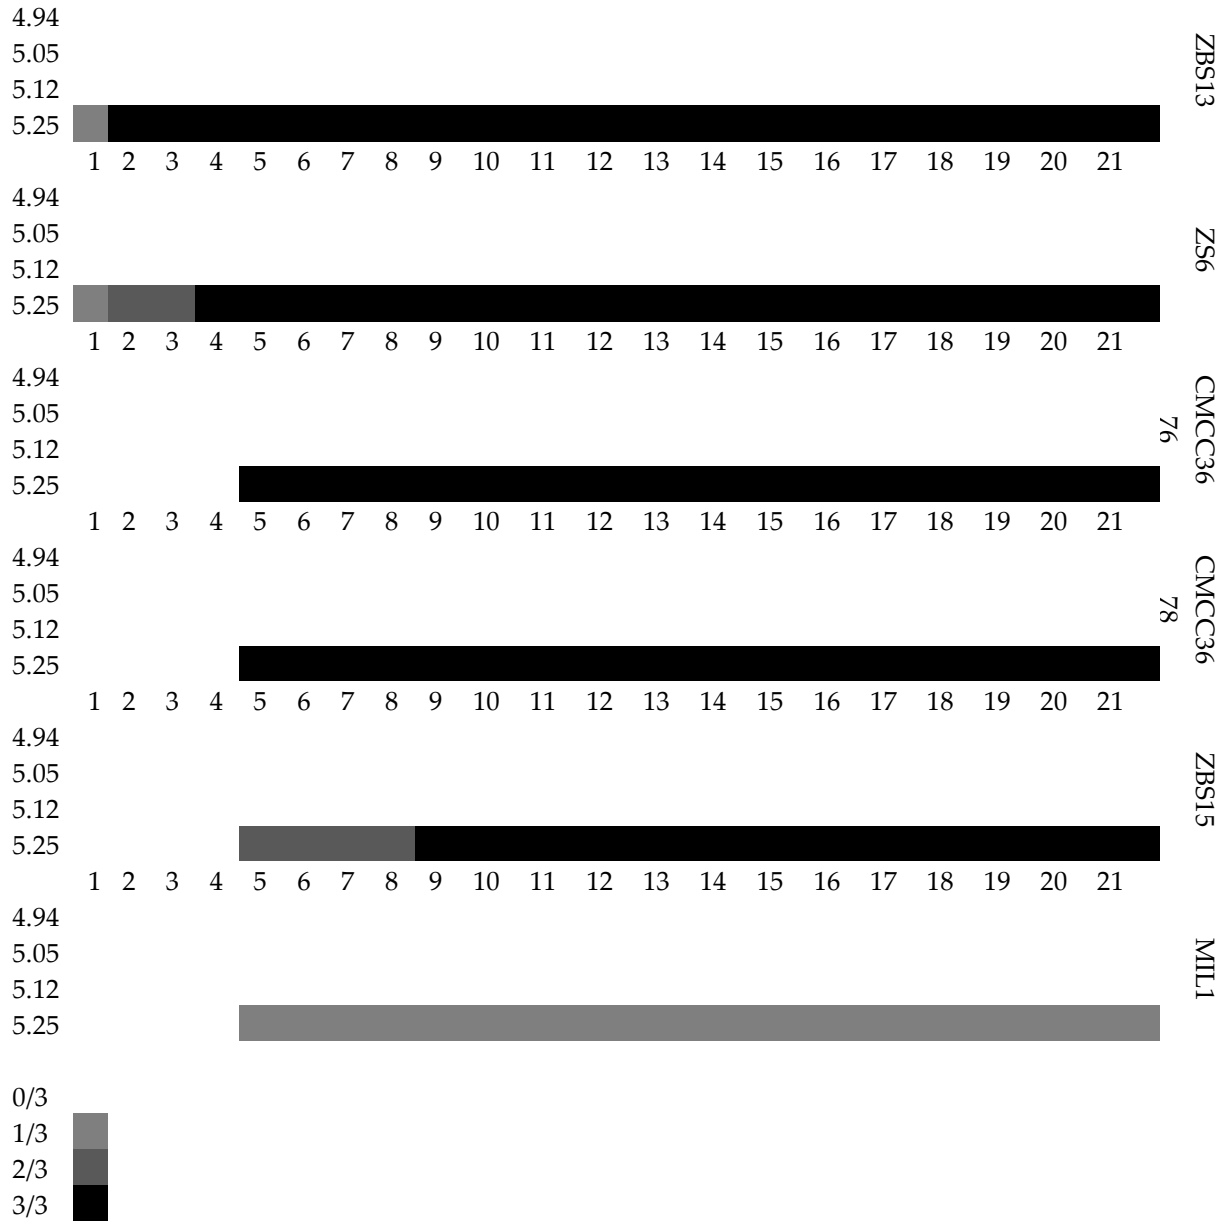

**Figure S2** Acid tolerance of different nontoxic isolates, NCTC8266 $\Delta$ bont::ermB and NCTC11219 $\Delta$ bont::ermB in liquid RCM medium supplemented with 1 M HCl (pH values; 5.25, 5.12, 5.05 and 4.95). Growth was studied for 21 days for three replicates per strain. Growth of all replicates is indicated.

Days to colony formation (>1 mm) of 1 or more replicates

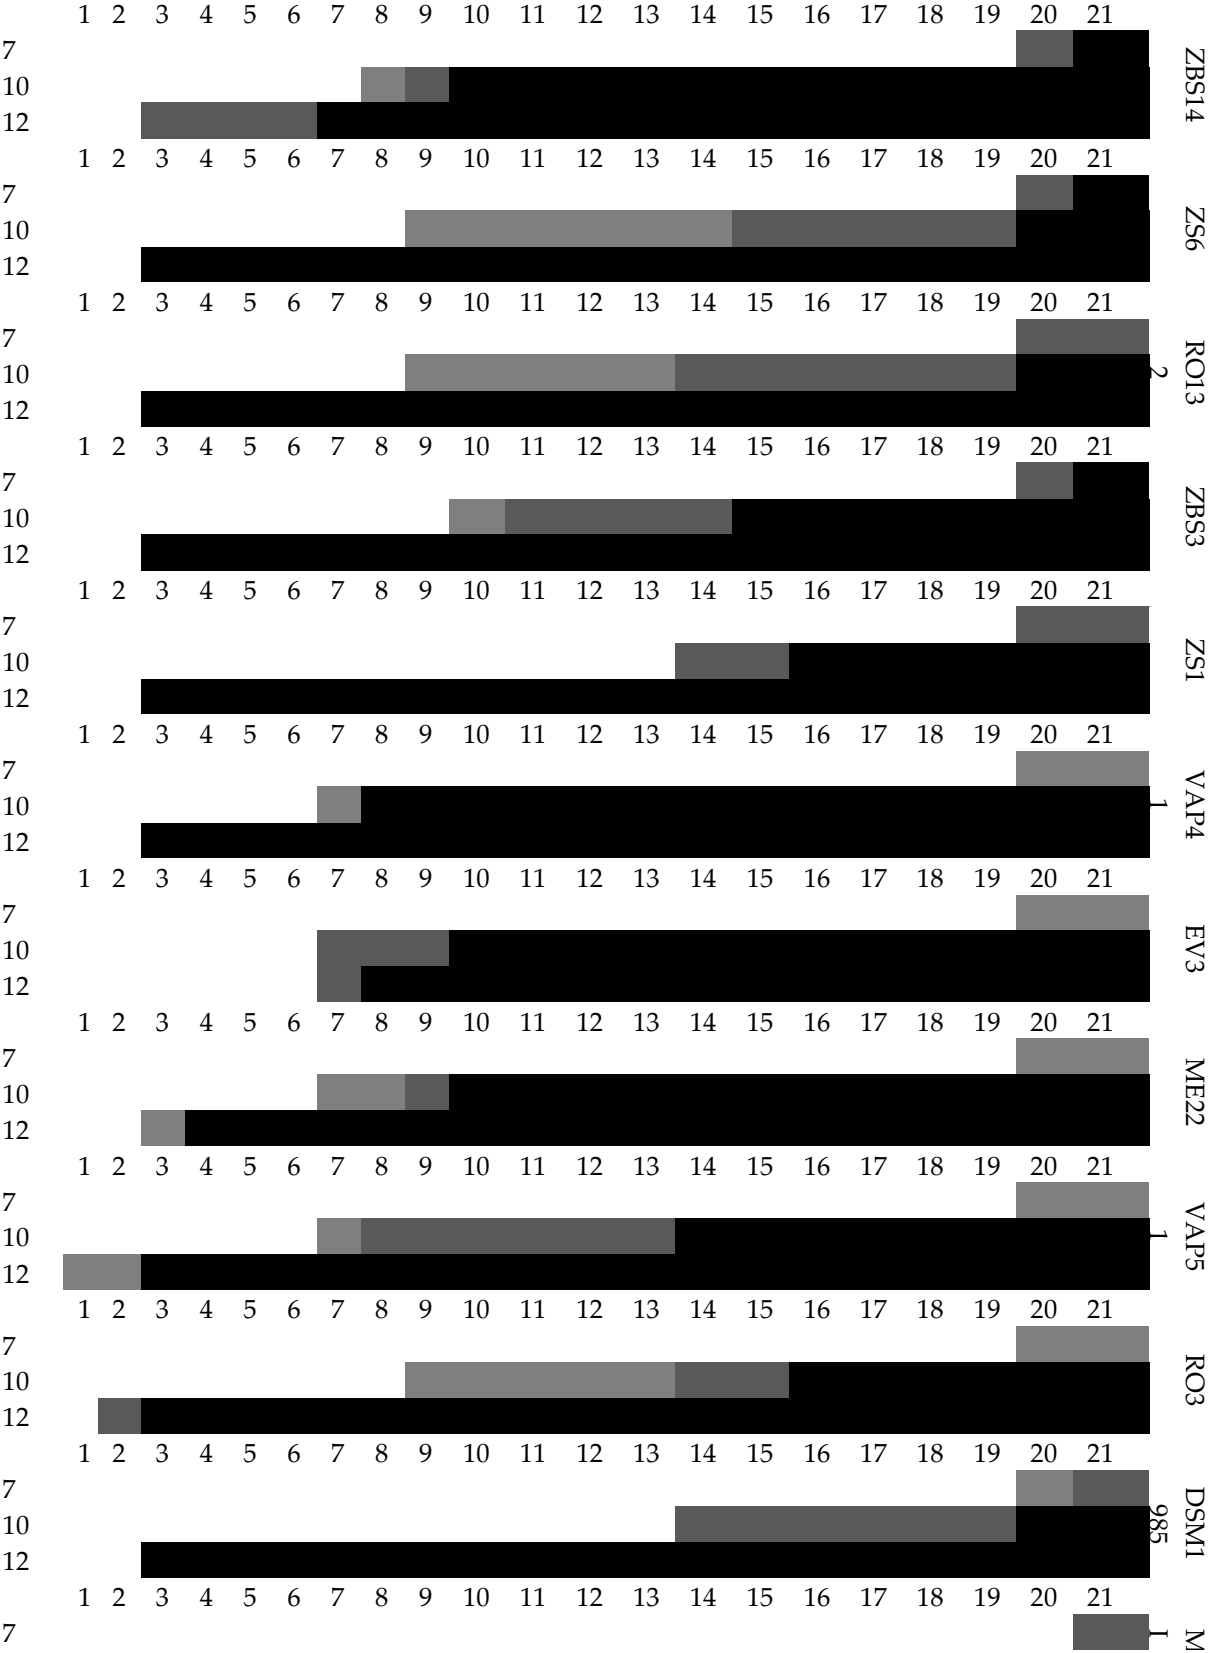

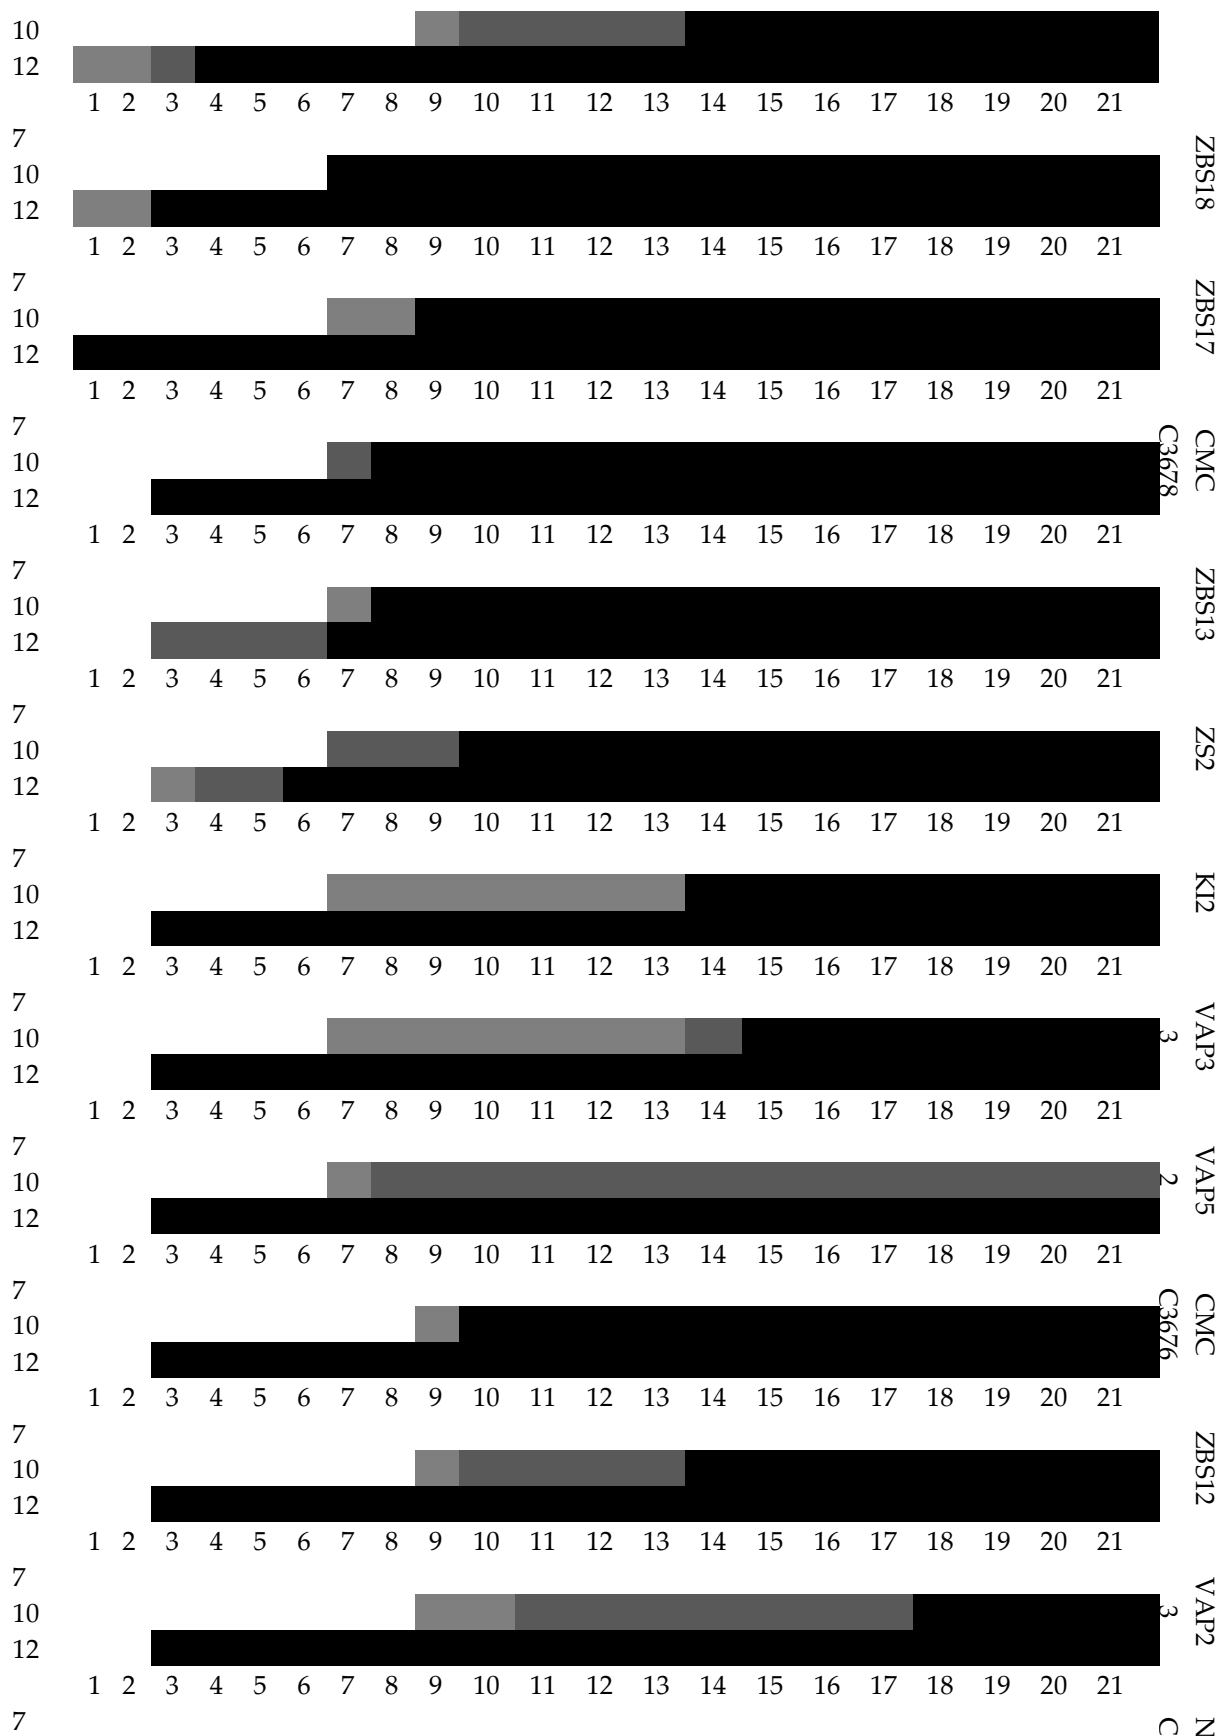

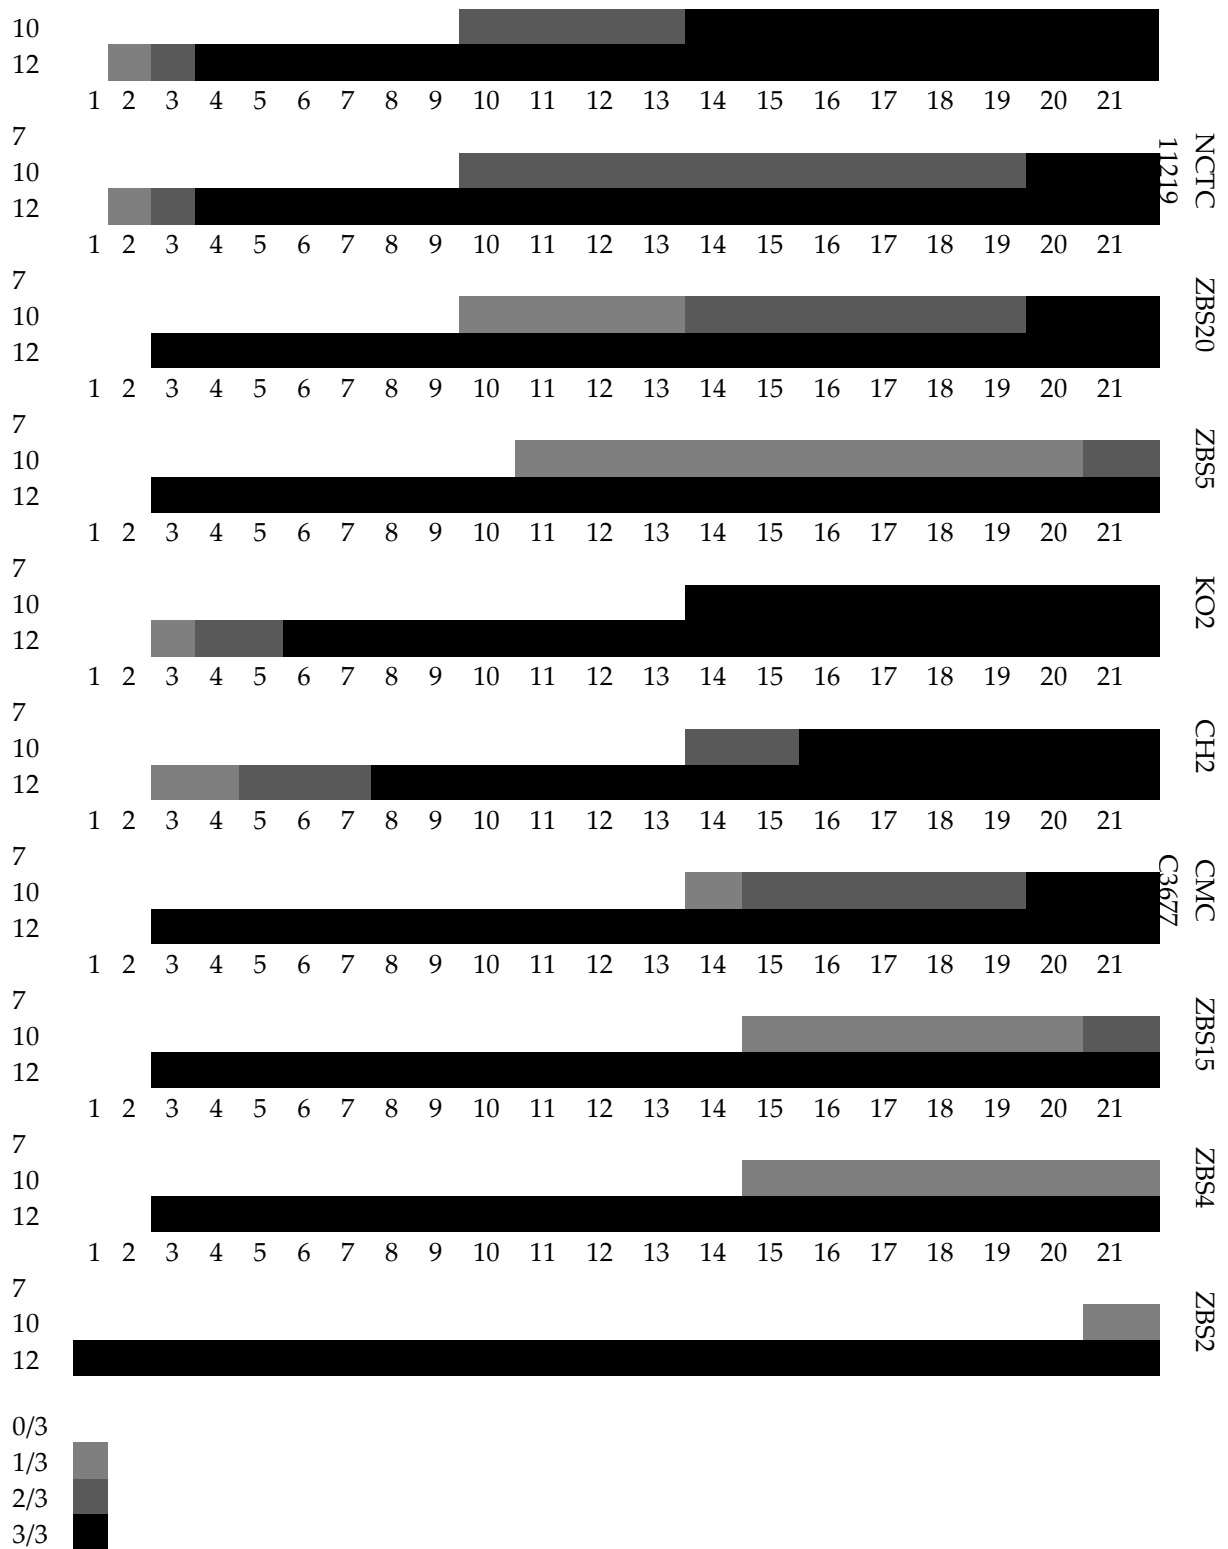

**Figure S3** Low temperature tolerance of different nontoxic isolates, NCTC8266Δbont::ermB and NCTC11219Δbont::ermB on solid RCM medium incubated at different temperatures (7°C, 10°C and 12°C). Growth was studied for 21 days for three replicates per strain. Growth of all replicates is indicated.

Reduction curves of ZS2 at 75°C and 85°C

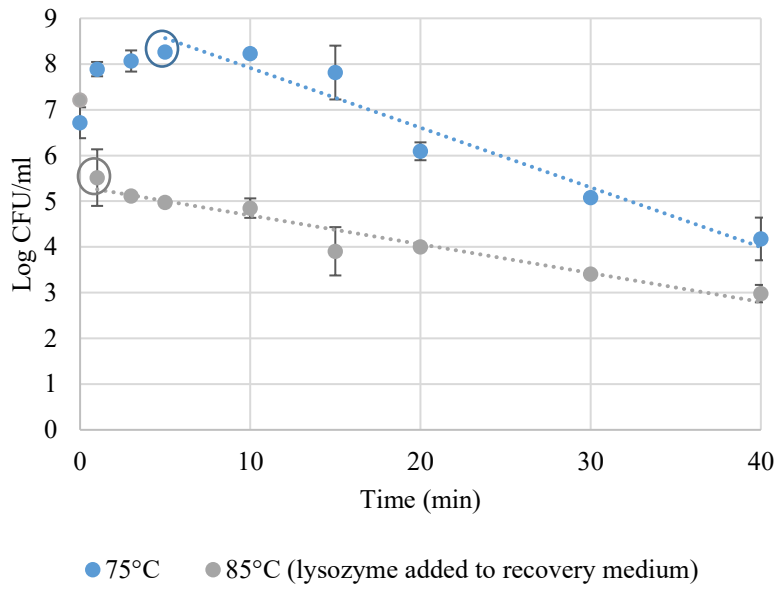

Reduction curves of KI2 at 75°C and 85°C

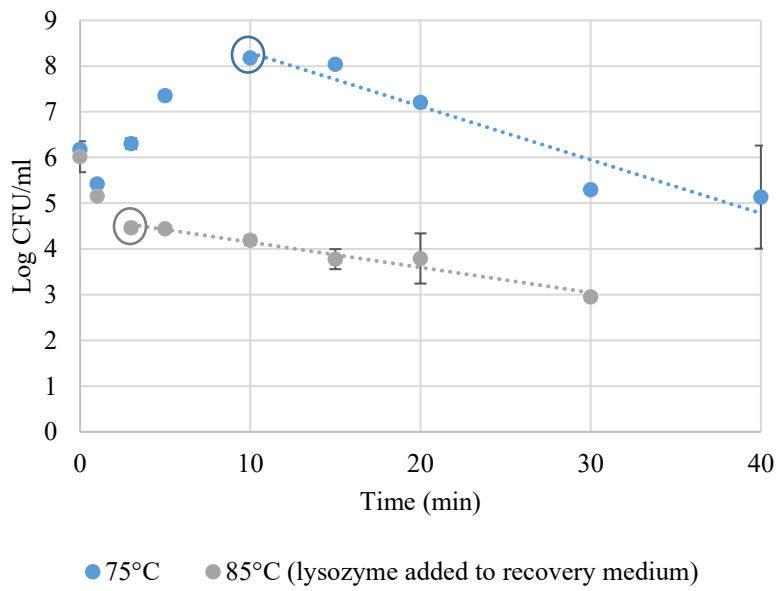



Reduction curves of VAP33 at 75°C and 85°C

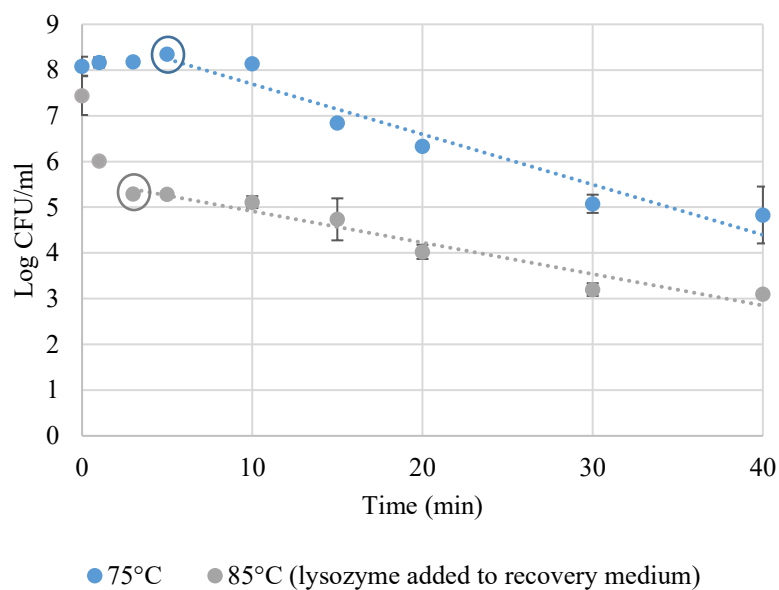

Reduction curves of ZBS15 at 75°C and 85°C

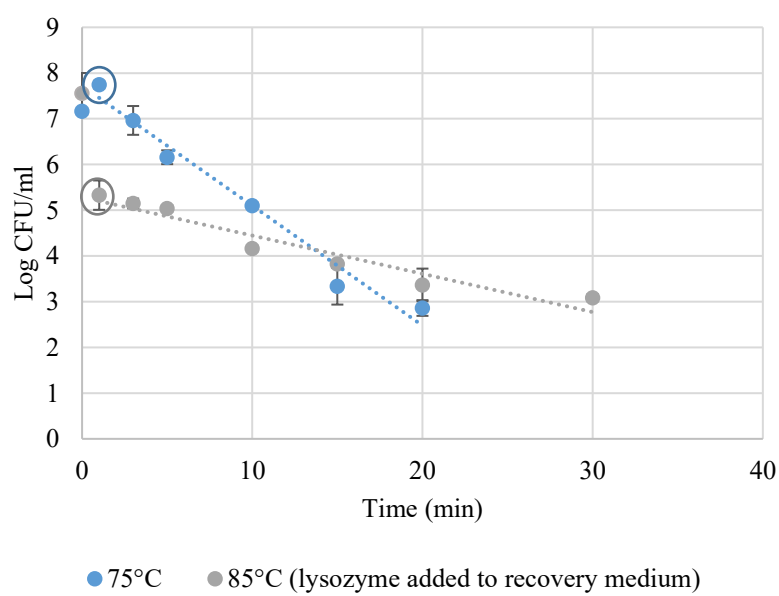

Reduction curves of ZS6 at 75°C and 85°C

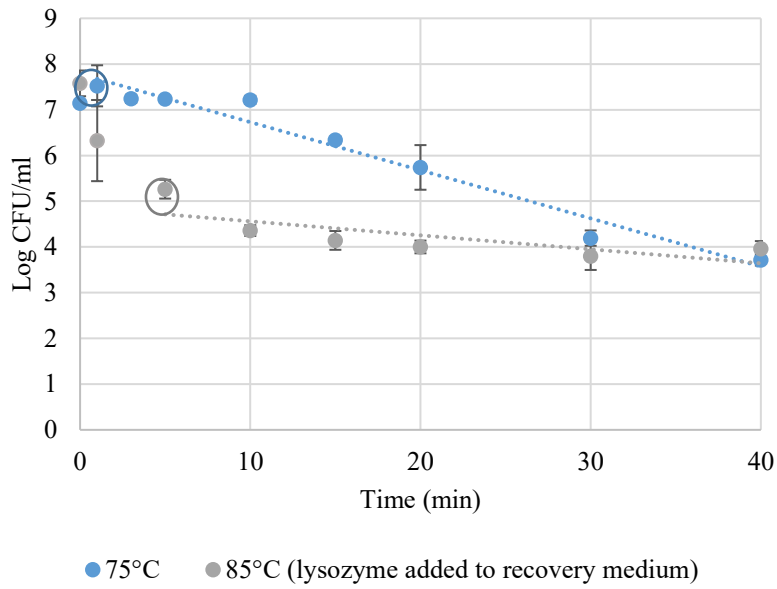

Reduction curves of CH2 at 75°C and 85°C

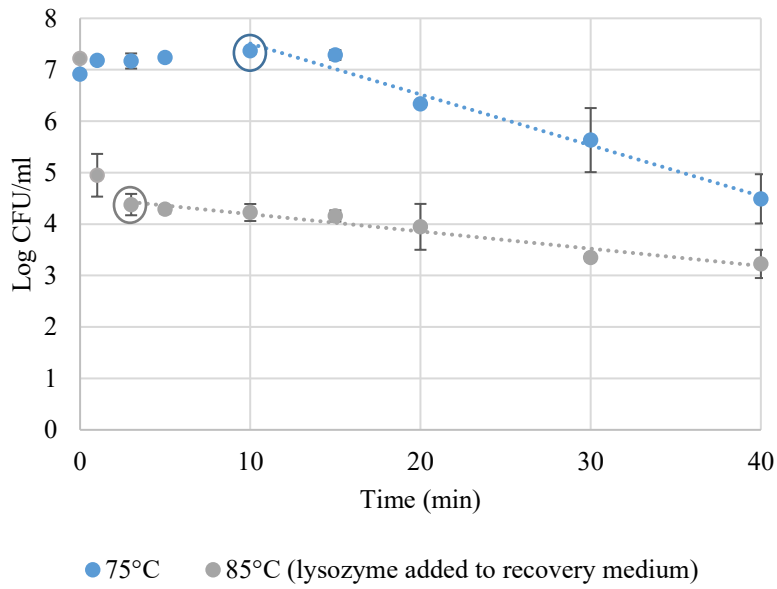

Reduction curves of CMCC3676 at 75°C and 85°C

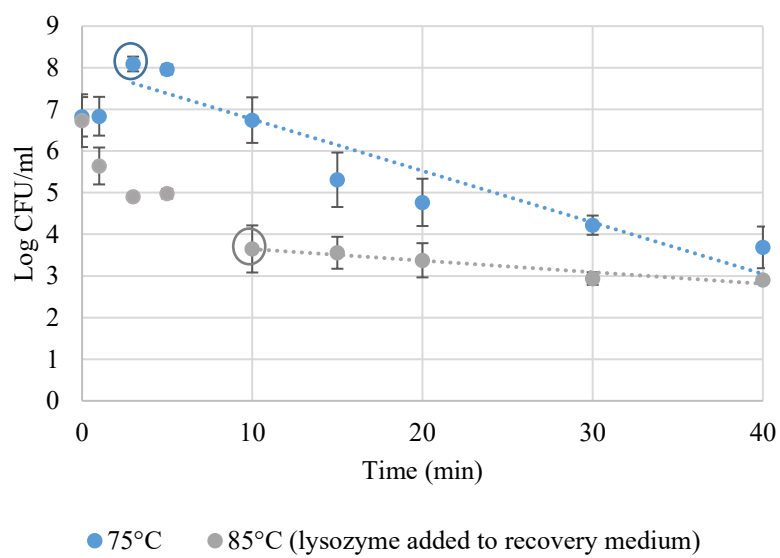

Reduction curves of ZBS5 at 75°C and 85°C

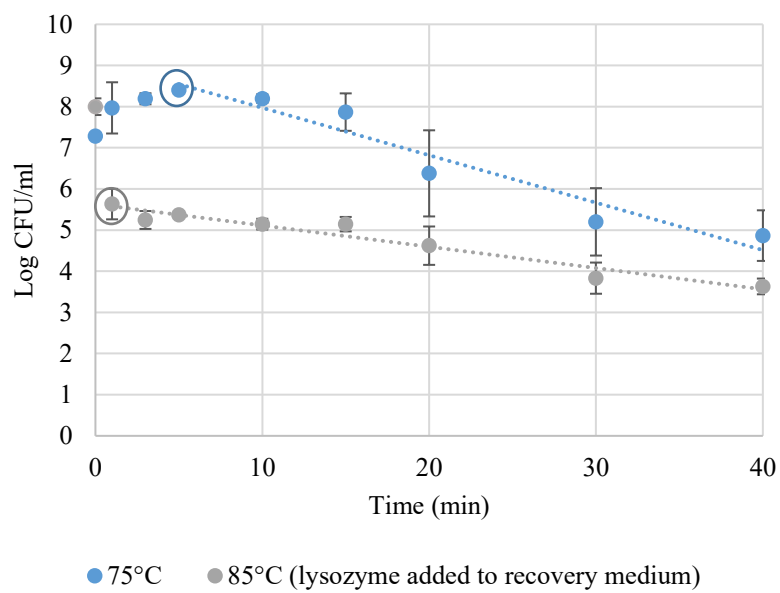

Reduction curves of CMCC3677 at 75°C and 85°C

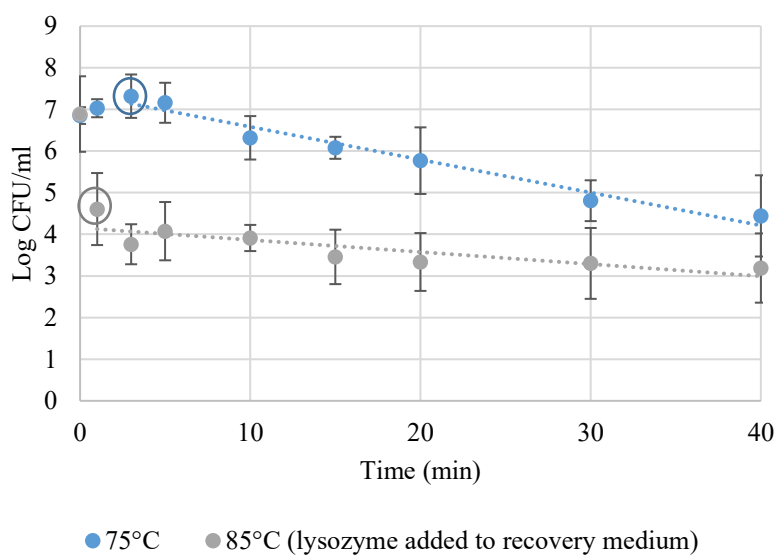

Reduction curves of VAP23 at 75°C and 85°C

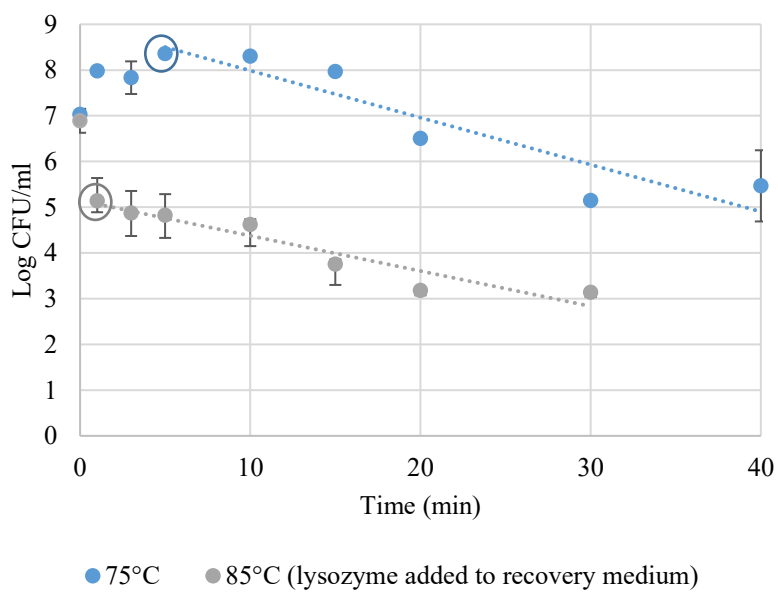

Reduction curves of VAP52 at 75°C and 85°C

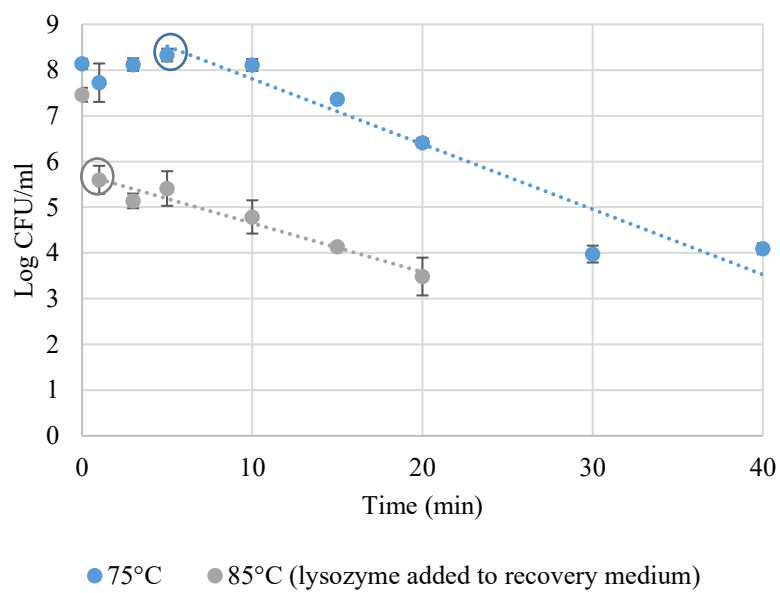

Reduction curves of RO3 at 75°C and 85°C

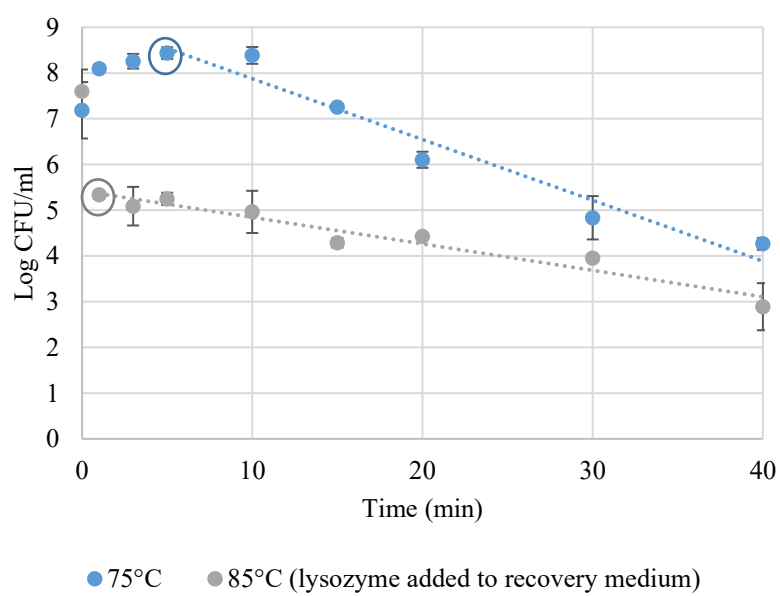

Reduction curves of ZBS20 at 75°C and 85°C

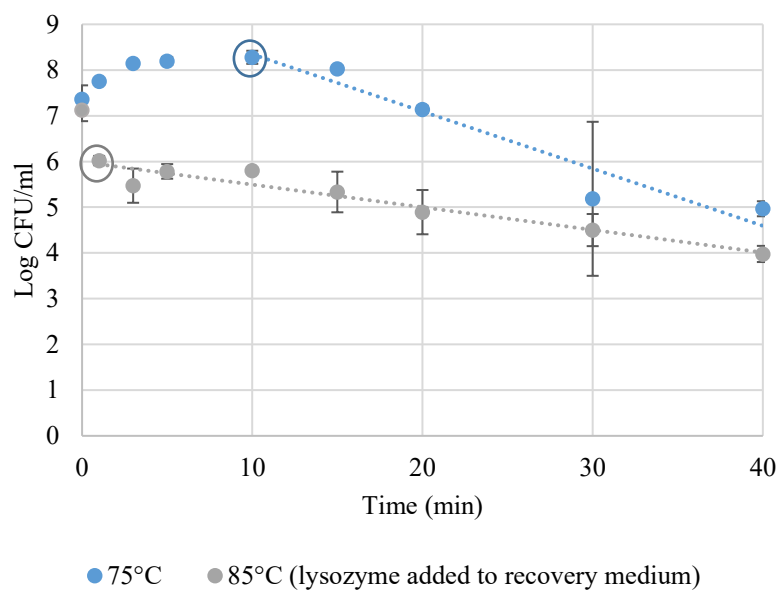

Reduction curves of VAP41 at 75°C and 85°C

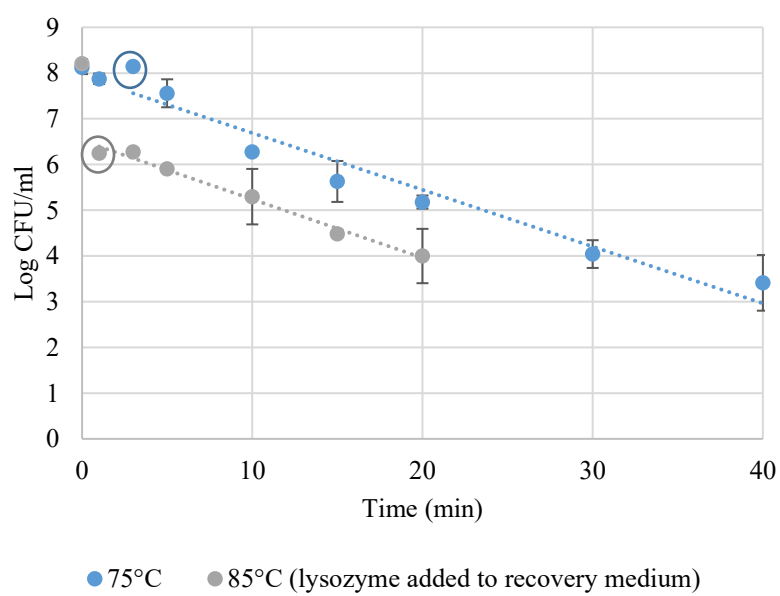

Reduction curves of ZBS4 at 75°C and 85°C

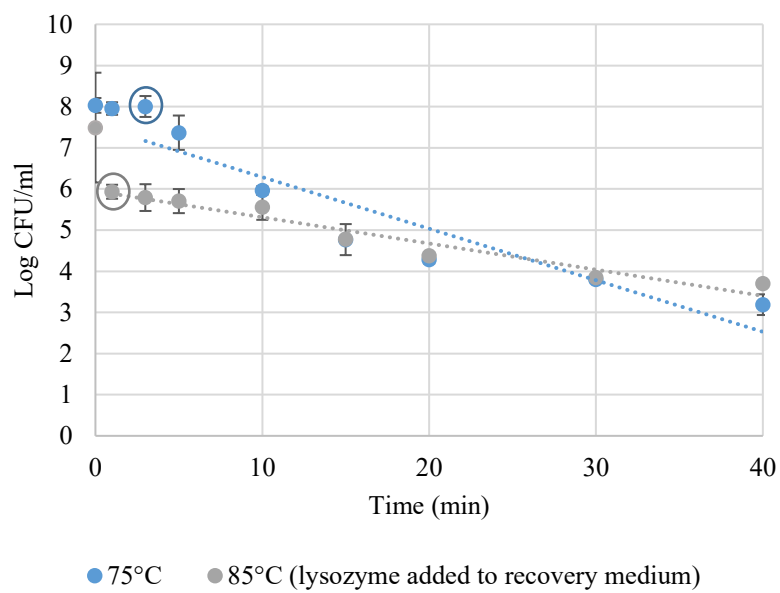

Reduction curves of KO2 at 75°C and 85°C

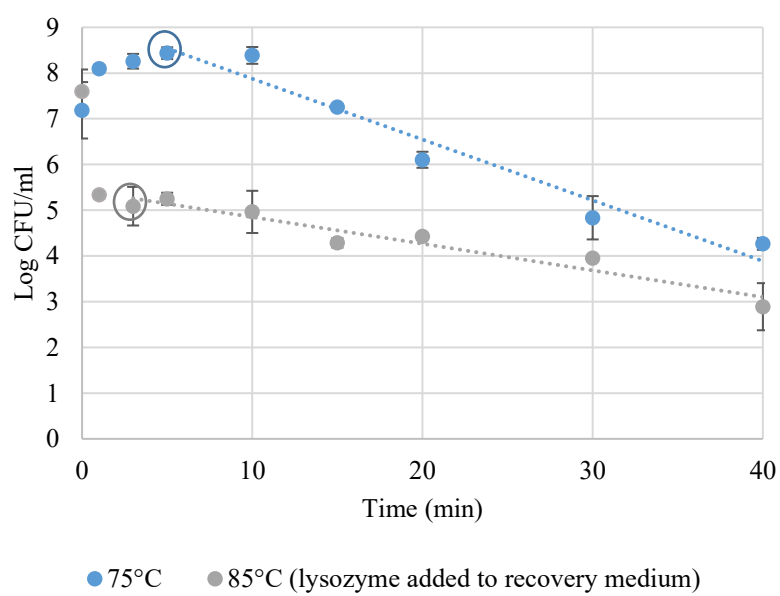

Reduction curves of VAP51 at 75°C and 85°C

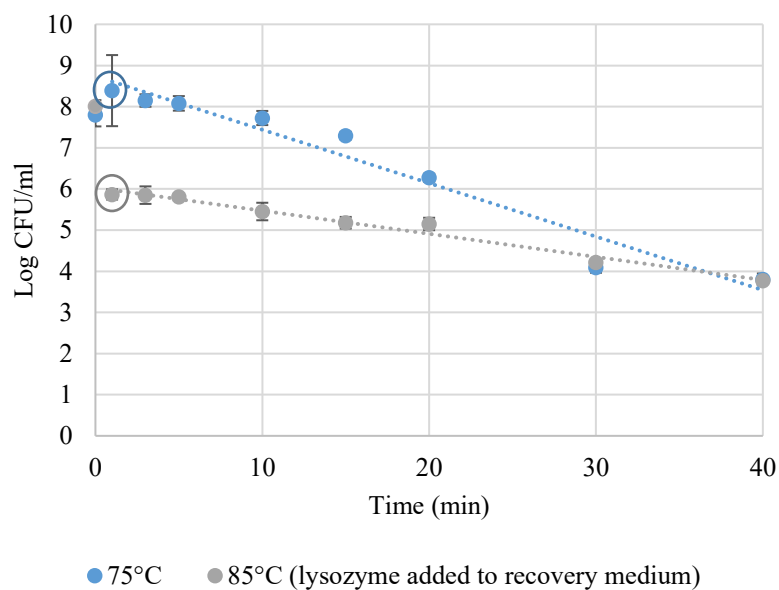

Reduction curves of ZBS17 at 75°C and 85°C

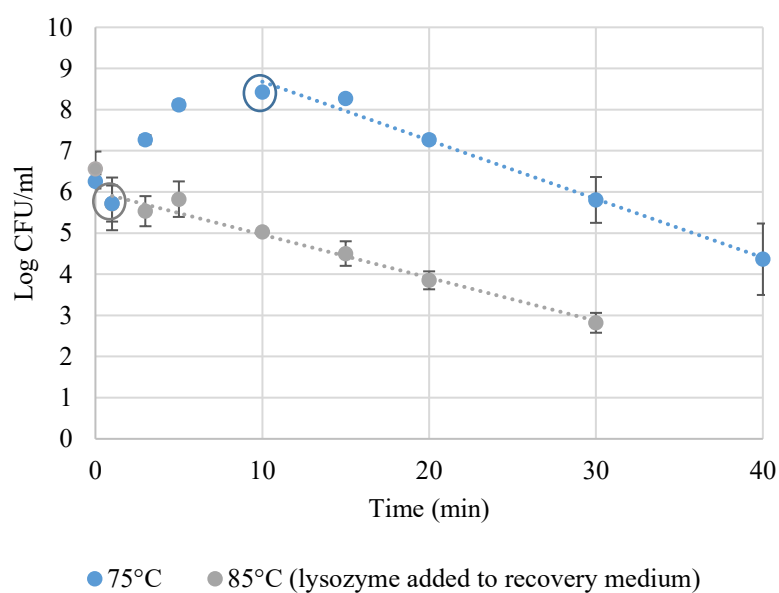



Reduction curves of ME22 at 75°C and 85°C

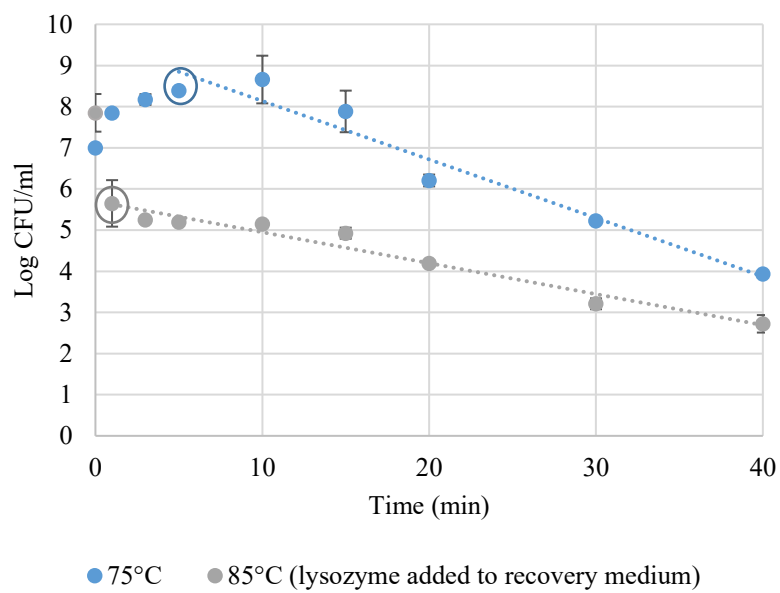

Reduction curves of ZBS13 at 75°C and 85°C

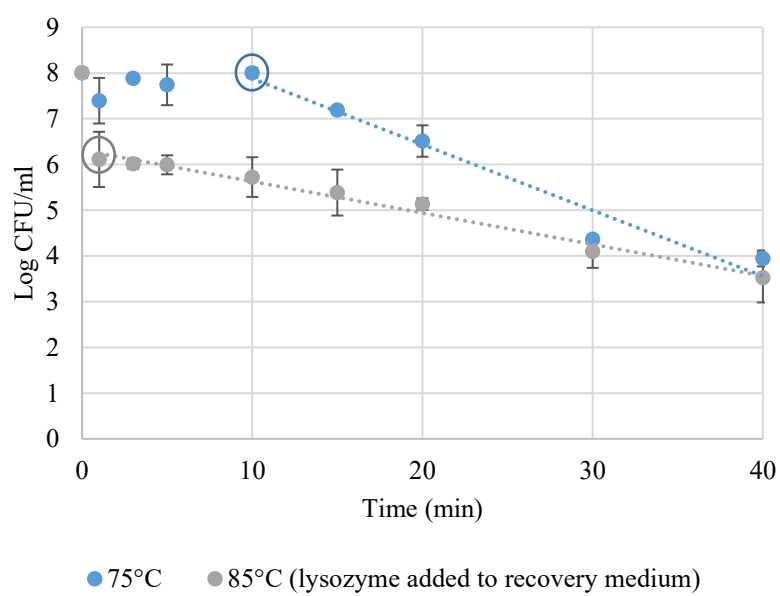

Reduction curves of EV3 at 75°C and 85°C

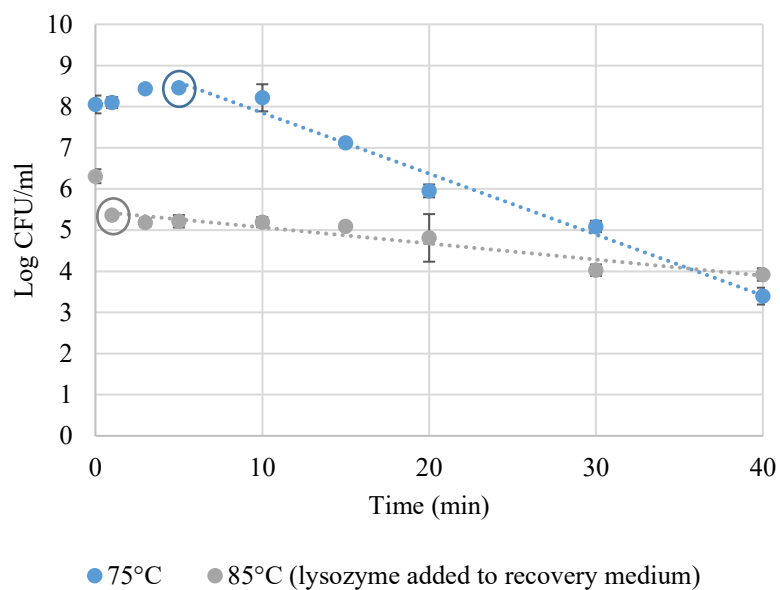

Reduction curves of ZBS18 at 75°C and 85°C

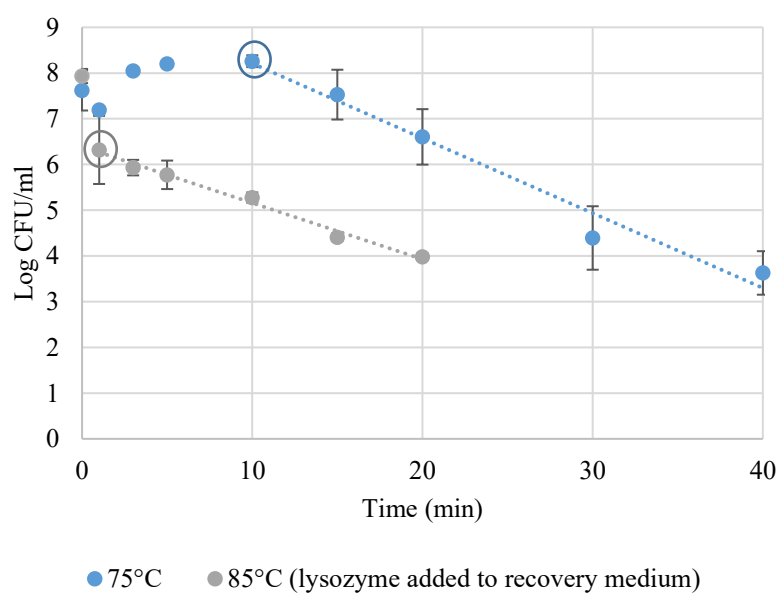

Reduction curves of ZBS2 at 75°C and 85°C

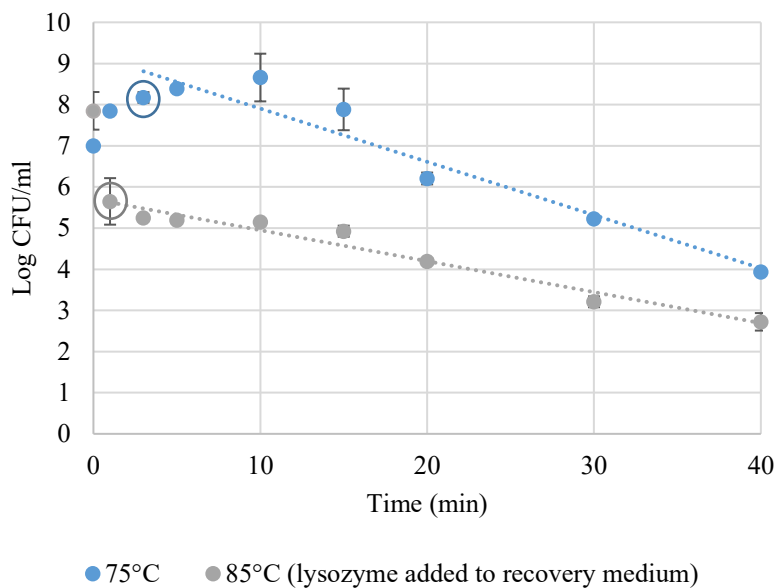

Reduction curves of ZBS14 at 75°C and 85°C

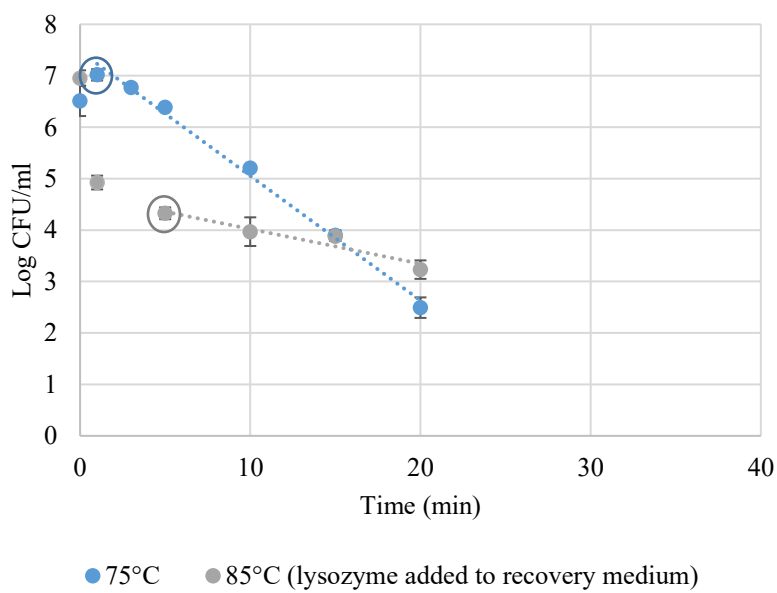

Reduction curves of RO132 at 75°C and 85°C

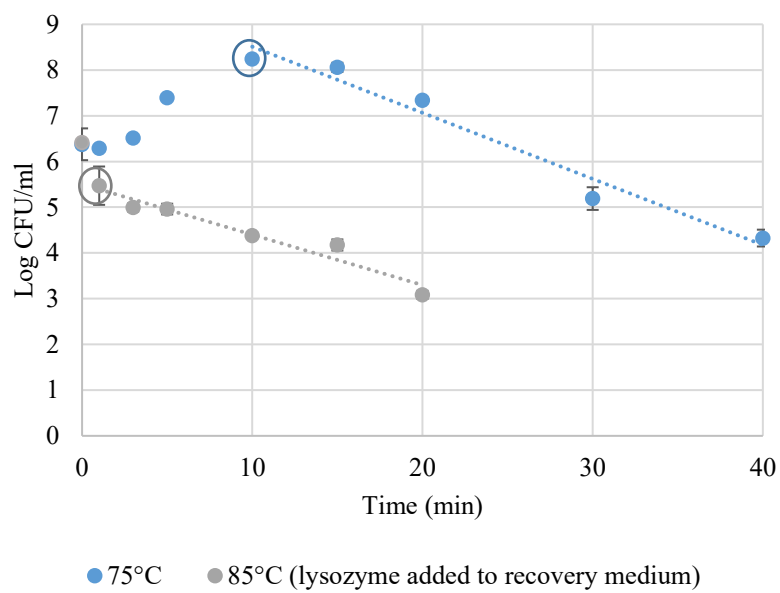

Reduction curves of MIL1 at 75°C and 85°C

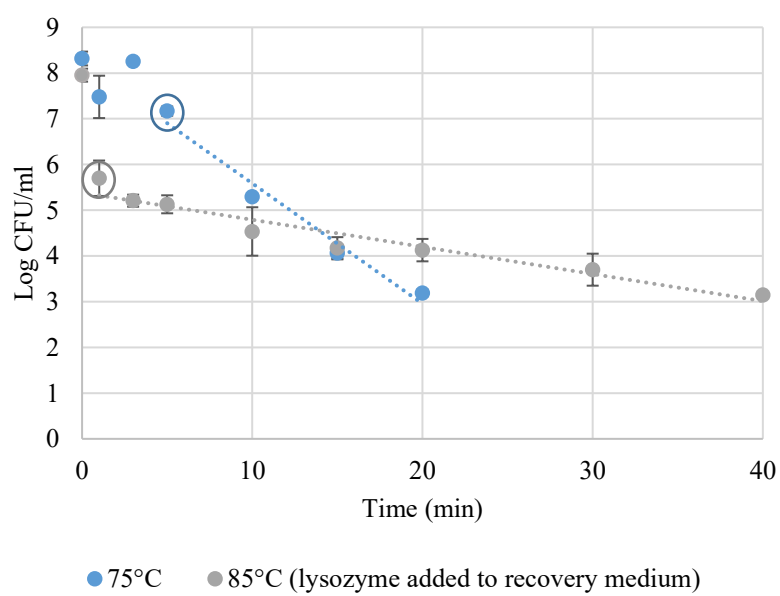

Reduction curves of CMCC3678 at 75°C and 85°C

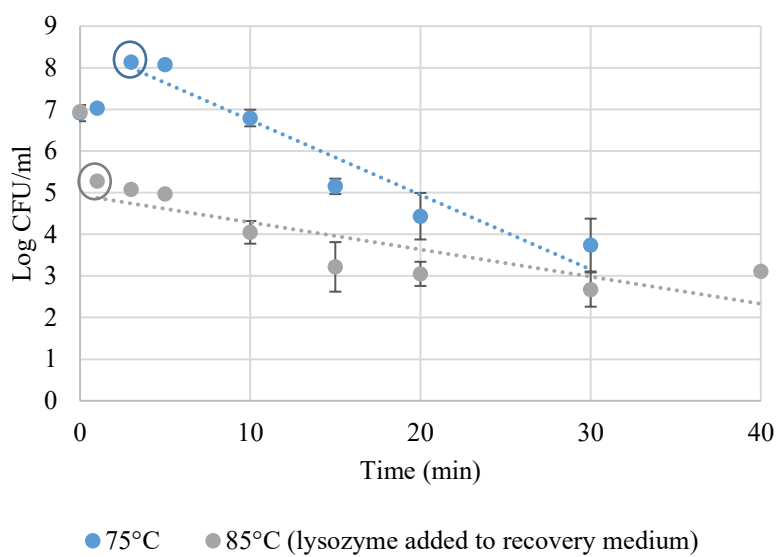

Reduction curves of ZBS12 at 75°C and 85°C

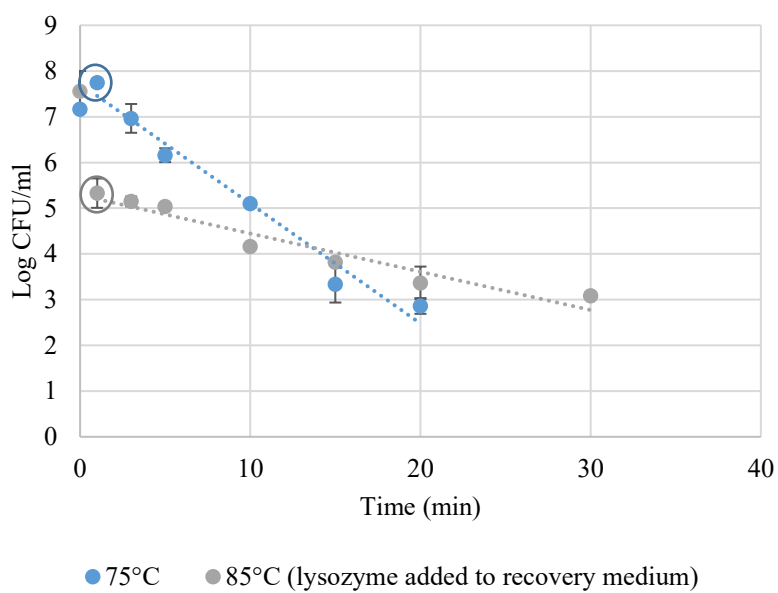

Reduction curves of NCTC11219 $\Delta$ BoNT:: ErmB  
at 75°C and 85°C

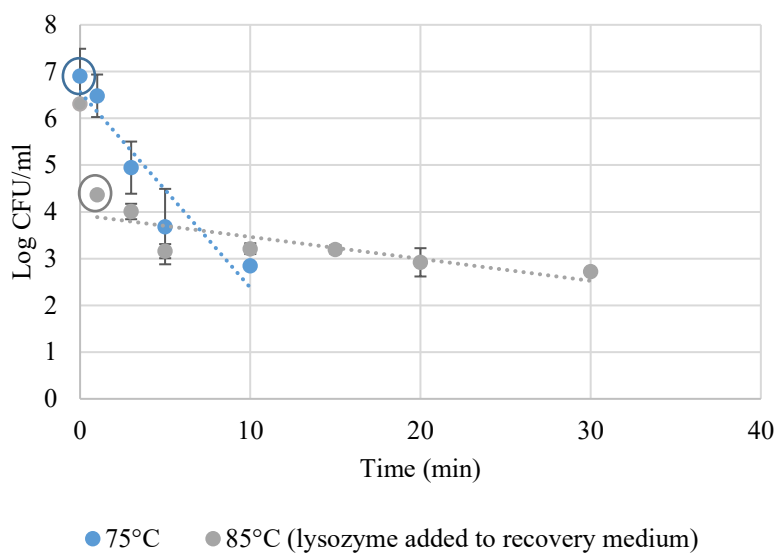

Reduction curves of ZS1 at 75°C and 85°C

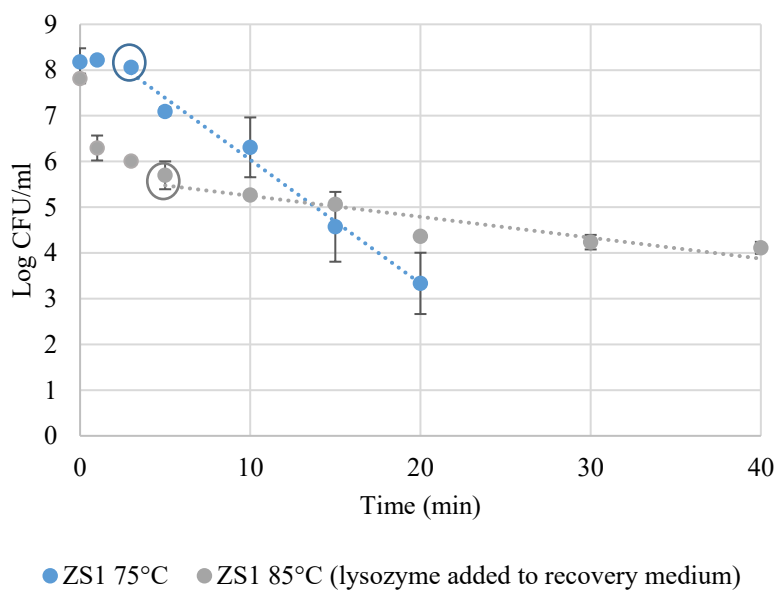

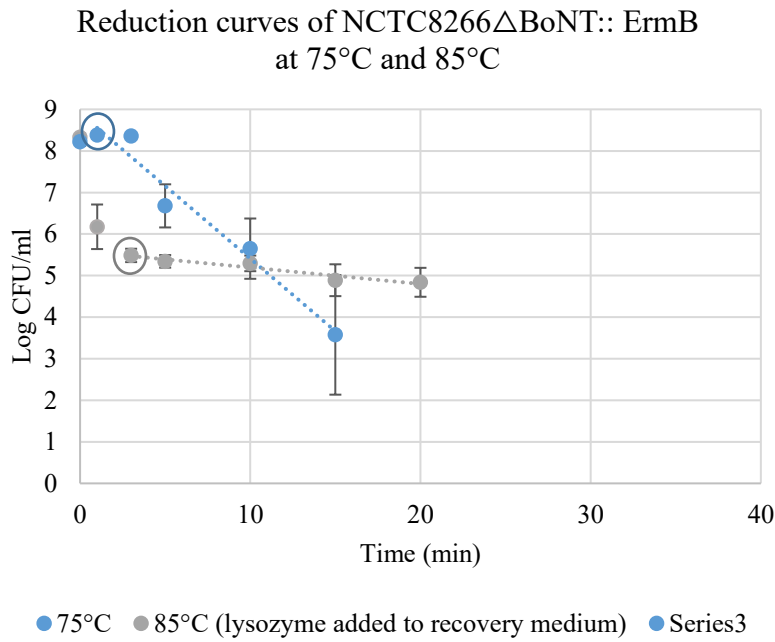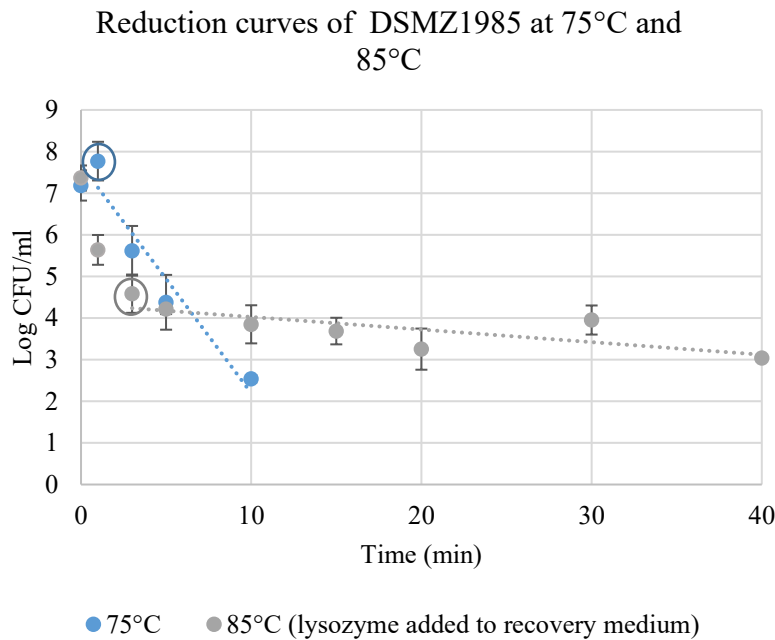

**Figure S4** Reduction curves for heat inactivation of all nontoxic isolates, NCTC8266 $\Delta$ bont::ermB and NCTC11219 $\Delta$ bont::ermB. The recovery medium for spores treated at 85°C was supplemented with lysozyme (10  $\mu$ g/ml). D-values of biphasic curves were calculated from the second part of the curve, taking the circled data point as the start. Average values  $\pm$  STDEV from three replicates are shown.
